1 **Title:**

2 **Difference in accumulation pattern of the allergens within the same PR10 family in**  
3 **transgenic rice**

4

5 **Running title:** Expression of Mal d 1 in transgenic rice

6

7 **Authors:**

8 Fumio Takaiwa<sup>1\*</sup>, Yuko Ogo<sup>1,2</sup>, Yuhya Wakasa<sup>1</sup>,

9

10 **Affiliations**

11 <sup>1</sup> Institute of Agrobiological Sciences, National Agriculture and Food Research Organization

12 Kannondai 2-1-2, Tsukuba, Ibaraki 305-8602, Japan

13 <sup>2</sup>Institute of Crop Science, National Agriculture and Food Research Organization,

14 Kannondai 2-1-2, Tsukuba, Ibaraki 305-8602, Japan

15

16 **E-mail address**

17 Fumio Takaiwa: [takaiwa@affrc.go.jp](mailto:takaiwa@affrc.go.jp), Yuhko Ogo: [ogogogo@affrc.go.jp](mailto:ogogogo@affrc.go.jp), Yuhya

18 Wakasa: [ywakasa@affrc.go.jp](mailto:ywakasa@affrc.go.jp)

19

20

21 **\*Corresponding author:**

22 Fumio Takaiwa

23 Plant Molecular unit, Institute of Agrobiological Sciences, National Agriculture and Food  
24 Research Organization, Kannondai 2-1-2, Tsukuba, Ibaraki 305-8602, Japan

25 TEL: +81-29-838-8373

26 E-mail.: [takaiwa@affrc.go.jp](mailto:takaiwa@affrc.go.jp)

27

28 The date of submission June 27, 2018

29 Number of Figures :9

30 Words (introduction to acknowledgement) 5956

31 Figures should be in color only online 9

32 Numbers of Supplementary Figures: 7

33

34 **Difference in accumulation pattern of the allergens within the same PR10 family in**  
35 **transgenic rice**

36

37 **Highlight**

38 Specific region of PR10 proteins is mainly implicated in their stability in vegetative tissues  
39 when expressed in transgenic rice.

40

41 **Abstract**

42 Apple food allergen Mal d 1 and birch pollen allergen Bet v 1 belong to the same pathogen  
43 related protein 10 (PR10) family. When each of these allergens was expressed as a  
44 secretory protein by fusion with the GFP reporter in transgenic rice by ligating an N  
45 terminal signal peptide and a C terminal KDEL ER retention signal under the control of the  
46 maize ubiquitin constitutive promoter, the GFP:Mald1 highly accumulated in various  
47 tissues, whereas the accumulation level of GFP:Betv1 was remarkably reduced in  
48 vegetative tissues except for seed. Analysis by RT-PCR exhibited that there was little  
49 difference in transcript levels between them, indicating the involvement of  
50 post-transcriptional regulation. To investigate the cause of such difference in accumulation  
51 levels, deletion analysis of the Mal d 1 and domain swapping between them were carried  
52 out in transgenic rice. These results showed that the region between positions 41-90 in the  
53 Mal d 1 is predominantly implicated in higher level accumulation in vegetative tissues as  
54 well as seed compared with the Bet v 1. It is notable that GFP:Mald1 directed by the  
55 ubiquitin promoter is deposited in huge PBs in aleurone layer rather than starchy  
56 endosperm.

57

58 **Key words:** Apple allergen, Bet v 1, PR10, protein body, Mal d 1, transgenic rice

59

60 **Abbreviations:** Cys, cysteine; BiP, binding protein; ER, endoplasmic reticulum; ER,  
61 elastin-like polypeptide; GFP, green fluorescence protein; OSA, oral allergy syndrome; PB,  
62 protein body; SDS-PAGE, sodium dodecyl sulfate polyacrylamide gel electrophoresis;  
63 RT-PCR; reverse transcription-polymerase chain reactions; PR10, pathogen related protein  
64 10, PDIL; protein disulfide isomerase

65

## 66 **Introduction**

67 Mal d 1 is the major allergen of apple fruit eliciting oral allergy syndrome (OAS) such as  
68 itching and swelling of lips, tongue and throat, which belongs to the family of  
69 pathogen-related 10 (PR10) proteins within the Bet v 1 superfamily (Mari *et al.* 2005;  
70 Fernandes *et al.*, 2013). It has been reported that more than 70% of birch pollen-allergic  
71 patients sensitizing to the major birch pollen allergen Bet v 1 display OAS after apple  
72 consumption (Geroldinger-Simic *et al.*, 2011). Namely, the OAS by apple is provoked by  
73 the allergic cross-reaction between the Mal d 1 and Bet v 1 specific IgE, indicating the  
74 presence of common sequences (IgE epitopes) and tertiary structure required for its  
75 binding to the Bet v 1 specific IgE. (Ebner *et al.*, 1991; Geroldinger-Simic *et al.*, 2011).

76 Mal d 1 is composed of 159 amino acids with the estimated molecular mass of 17.5 kDa.  
77 Its subcellular localization is estimated to be intracellular and cytoplasmic like the other  
78 PR10 proteins, since there is no signal peptide sequence directing to the endomembrane  
79 system as a secretory protein (Fernandes *et al.* 2013). Mal d 1 is mainly present in the  
80 pulp and peel of apple, but is not only expressed in apple fruit but also in various vegetative  
81 tissues and seed (Beuning *et al.*, 2004; Marzban *et al.*, 2005). Although the biological  
82 function of Mal d 1 remains unknown well, its expression has been studied to respond to  
83 fungal or bacterial infection and also to be activated by stress and storage, suggesting that it  
84 participates in defense mechanism against pathogens or abiotic stress like other PR10  
85 proteins (Fernandes *et al.* 2013).

86 Mal d 1 is encoded by a multigene family composed of 31 members, which are divided  
87 into four groups based on amino acid sequence similarities, Mal d 1.01, Mal d 1.02, Mal d  
88 1.03 and Mal d 1.04 (Mal d 1 a-d) (Pagliarani *et al.*, 2013). Mal d 1.01 and Mal d 1.02 are  
89 predominantly expressed in apple fruit (peel and pulp) (Marzban *et al.*, 2005). Amino  
90 acid sequence identities between Mal d 1 isoforms and Bet v 1 range from 55 to 68 % (Ma  
91 *et al.*, 2006).

92 Rice seed provides good production platform for high-value recombinant proteins in  
93 terms of scalability, safety, stability and cost-effectiveness (Stoger *et al.*, 2005; Takaiwa *et*  
94 *al.*, 2015). Especially, when recombinant proteins are produced as secretory protein and  
95 then deposited into protein-bodies (PBs) in the endosperm cells, they are highly and stably  
96 accumulated (Takaiwa *et al.*, 2017). Moreover, when orally administered, it has been  
97 known that recombinant proteins bio-encapsulated in PBs are effectively delivered to small  
98 intestine without degradation with digestive enzymes in gastrointestinal tract, providing an  
99 ideal delivery system to gut-associated lymphoid tissues (GALT) as oral mucosal vaccines  
100 (Hofbauer and Stoger, 2013; Takaiwa *et al.*, 2015).

101 We previously generated transgenic rice seeds containing versatile hypo-allergenic  
102 derivatives of major birch pollen allergen Bet v 1 referred to as tree pollen chimera7 (TPC7)  
103 or TPC9, which have been developed as allergy vaccines (tolerogens) against the major  
104 allergens of trees belonging to the Fagales order Bet v 1 family for allergen-specific  
105 immunotherapy (Wang *et al.*, 2013). When these native Bet v 1 and its derivatives (TPC7  
106 and TPC9) were expressed as secretory protein in rice seeds under the control of the  
107 endosperm-specific glutelin *GluB-1* promoter by ligating the glutelin *GluB-1* signal peptide  
108 and the KDEL ER retention signal to their N- and C-termini, they were deposited in  
109 remarkably huge spherical ER-derived PBs designated as TPC7 bodies with the size of  
110 >10  $\mu\text{m}$  (Wang *et al.*, 2013; Ogo *et al.*, 2014). Furthermore, their accumulation levels  
111 reached about 23% of total seed proteins (Ogo *et al.*, 2014). Such ability to form huge PBs

112 is expected to have a potential to produce high amounts of foreign recombinant proteins  
113 by fusion to them. Moreover, it is interesting to examine whether properties yielding such  
114 huge PB formation and high productivity are retained in vegetative tissues, when expressed  
115 in vegetative tissues.

116 In this study, we examined whether Mal d 1, Bet v 1 and TPC7 within the same  
117 PR10 family are deposited in huge ER-derived PBs in various tissues of transgenic rice.  
118 When expressed under the control of the maize ubiquitin constitutive promoter, it was  
119 shown that the Mal d 1 stably and highly accumulates in vegetative tissues as well as seed,  
120 whereas the accumulation levels of the Bet v 1 and TPC7 are very low in vegetative  
121 tissues except for seed. Analysis by deletion and domain-swapping between the Mal d 1  
122 and Bet v 1 demonstrated that this difference is mainly attributed to the region between  
123 positions 41-90.

124

## 125 **Methods**

### 126 **Construction of expression vectors and generation of transgenic rice**

127 The DNA sequences encoding Mal d 1, Bet v 1 and TPC7 were optimized for translation  
128 based on the codons frequently used in rice seed storage protein genes and their DNA  
129 sequences were synthesized by GenScript Corporation (NJ, USA). The N terminal signal  
130 peptide of the glutelin GluB-1 that is required for translocation into the ER and the KDEL ER  
131 retention signals were attached to their N and C termini, respectively. The gene encoding  
132 the green fluorescence protein (GFP) reporter was inserted in frame between the GluB-1  
133 signal and these PR10 related genes. In order to express specifically in the endosperm or  
134 constitutively in vegetative tissues, 2.3kb glutelin *GluB-1* promoter or maize ubiquitin  
135 promoter were ligated upstream of these three fusion constructs, which were followed by  
136 the 0.65kb of glutelin *GluB-1* terminator (Fig. 1B).

137 These gene expression cassettes inserted into entry vector were transferred into

138 destination binary vector (p35SHPTAg7-GW) harboring the CaMV35S  
139 promoter::hygromycine phosphotransferase gene (*HPT*) as selectable marker gene via the  
140 MultiSite Gateway LR Clonase reaction (Invitrogen) (Wakasa *et al.*, 2006). These binary  
141 vector plasmids containing various expression constructs were introduced into rice genome  
142 via *Agrobacterium*-mediated transformation (Goto *et al.*, 1999).

143 For each construct, more than 16 independent transgenic lines (16-30 lines) were  
144 generated. Transgenic rice plants were selected by hygromycin resistance and grown in the  
145 closed control greenhouse (33°C, 16h light/8h dark cycle).

146

#### 147 **SDS-PAGE and immunoblot analysis**

148 Individual mature grain (four grains per independent transgenic line) and leaves and  
149 roots frozen in liquid nitrogen were ground into a fine powder using a Multibeads shocker  
150 (Yasui Kikai, Osaka, Japan). Total proteins were extracted from the powder of a mature  
151 grain, leaves and roots with 400  $\mu$ l (grain) or 200  $\mu$ l (leaves and roots) of urea-SDS buffer  
152 (50 mM Tris-HCl, pH 6.8, 8M urea, 4% SDS, 5% 2-mercaptoethanol (2-MER), 20% glycerol)  
153 as described previously (Tada *et al.*, 2003). After separation of total protein extract (2-5  $\mu$ l)  
154 by electrophoresis on 13% SDS-PAGE, proteins were visualized by Coomassie Brilliant  
155 Blue (CBB)-R250 staining or were transferred to PVDF membranes (Millipore, Billerica, MA,  
156 USA) for immunodetection with rabbit anti-GFP or appropriate antibodies. Rabbit antibodies  
157 against TPC7, rice glutelin A (GluA), and rice chaperones of binding protein 1 (BiP1) and  
158 4&5 (BiP4/5), protein disulfide isomerase-like 1-1 and 2-3 (PDIL1-1 and PDIL2-3), and  
159 calnexin (CNX) were prepared as described previously (Yasuda *et al.*, 2009; Oono *et al.*,  
160 2010; Wakasa *et al.*, 2011; Wang *et al.*, 2013). For immunodetection, membranes were  
161 incubated with rabbit antibodies, followed by horseradish peroxidase-conjugated  
162 anti-rabbit secondary IgG antibodies (dilution 1:5000) (Cell Signaling Technology, Danvers,  
163 MA, USA). Bands were visualized using Clarity Western ECL detection kit (Bio-Rad).

164

165 **Confocal laser scanning microscopy and electron immunomicroscopy**

166 Developing seeds were harvested 15–20 days after flowering (DAF) from various transgenic  
167 lines and then cross-sectioned with a DTK-1000 Microslicer (Dosaka EM) to approximately  
168 150  $\mu\text{m}$  in thickness for indirect immune-histochemical analysis (Yasuda *et al.* 2006).  
169 Mouse anti-GFP monoclonal antibody, rabbit anti-CNX, anti-PDIL1-1, anti-PDIL2/3,  
170 anti-BiP1-1, anti-BIP4/5, anti-TIP3 and anti-RM1 (14kDa prolamin) polyclonal antibodies  
171 were used to investigate their intracellular localization by Alexa-488 conjugated  
172 anti-mouse IgG antibody and Alexa-546 conjugated anti-rabbit IgG antibody. After  
173 immunostaining of samples, rhodamine B was used to stain ER-derived protein bodies  
174 (PB-Is). Samples cross-sections were spread on glass slides, sealed with a cover glass, and  
175 observed with a confocal laser scanning microscope (FLUOVEIW; OLYMPUS, Tokyo,  
176 Japan).

177

178 **RNA extraction and RT-PCR analysis**

179 Total RNA was extracted from seeds as previously described (Takaiwa *et al.*, 1987).  
180 RT-PCR analysis was carried out using ReverTraAce qPCR RT Master Mix with gDNA  
181 Remover (TOYOBO, Osaka, Japan) with gene-specific primers for GFP and 17S rRNA.

182

183 **Extraction of recombinant proteins from mature seeds**

184 Leaves and roots were collected from each transgenic rice plant and frozen instantly in  
185 liquid nitrogen and then powdered using a Multibeads shocker. Pulverized seed,  
186 leaves and roots were treated with ten volume of various extraction buffer (200  $\mu\text{l}$ ) for  
187 20 min by vortex, and then centrifuged at 15000 rpm for 10 min. The supernatant was  
188 transferred to new tube and then equal volume of 2x sample buffer (125 mM Tris-HCl  
189 (pH6.8), 20% glycerol, 4%SDS) without 2-MER was added. Some aliquot (5ul) was

190 applied and subjected to electrophoresis on 6 or 8 % SDS-PAGE.

191

## 192 **Results**

### 193 **Endosperm-specific expression of Mal d 1 in transgenic rice**

194 When GFP:Mald1 fusion protein were expressed as the secretory protein by ligating  
195 an N terminal glutelin signal peptide and a C terminal KDEL ER retention signal under the  
196 control of the endosperm-specific 2.3 kb glutelin *GluB-1* promoter, it accumulated at high  
197 levels in the endosperm of transgenic rice, which was detected as a visible band with the  
198 molecular mass of 50 kDa on CBB staining gel (Fig. S1). However, when the KDEL ER  
199 retention signal was removed, its accumulation (GFP:Mald1(-KDEL)) was significantly  
200 decreased. Furthermore, when produced in the cytoplasm by the absence of both the  
201 signal peptide and KDEL tag, its accumulation level (GFP:Mald1(-sig/-KDEL)) was  
202 remarkably reduced to undetectable level (Fig. S1). These results are in remarkable  
203 contrast with the expression of the inherent Mal d 1 in apple fruit, since it accumulates at  
204 relatively high level (1-20 µg/g FW) irrespective of absence of the signal peptide (Matthes  
205 and Schmitz-Eiberger, 2009).

206 On the other hand, when GFP:Mald1 was expressed as secretory protein in seeds, its  
207 effect on expression levels of various chaperones proteins was analyzed by immunoblotting  
208 using specific antibodies. In these transgenic seeds BiPs (BiP1 and BiP4/5) and PDIL2-3  
209 were significantly increased compared with those in GFP:Mald1(-sig/-KDEL) construct,  
210 indicating that ER stress was induced by production at high level as secretory protein (Fig.  
211 S1).

212 Subcellular localization of GFP:Mald1 with the presence or absence of the KDEL signal  
213 was investigated in maturing transgenic seeds by immuno-histological analysis using  
214 confocal laser scanning microscopy. As shown in Fig. 2A, the GFP:Mald1 containing the  
215 KDEL signal was deposited in a spherical huge ER-derived protein body called as TPC7



216 body (Wang *et al.*, 2013) with a diameter of 5-10  $\mu\text{m}$  in maturing endosperm cells. By  
217 contrast, when the KDEL tag was removed, generation of giant PBs was lost and the  
218 GFP:Mald1(-KDEL) was sequestered in small granules in ER lumen (Fig. 2B).

219

### 220 **Constitutive expression of Mal d 1, Bet v 1 and TPC7 in transgenic rice**

221 The GFP:Mald1, GFP:Betv1 and GFP:TPC7 containing the GluB-1 signal peptide and  
222 KDEL ER retention signal at their N and C termini were expressed under the control of  
223 the maize ubiquitin promoter. The GFP:Mald1 accumulated in mature seeds at higher  
224 levels than the GFP:Betv1 and GFP:TPC7 (Fig. 3A). Next, individual whole seed  
225 expressed from these expression constructs was divided into the embryo and endosperm  
226 parts and their accumulation levels were examined by immunoblotting using anti-GFP  
227 antibody. As shown in Fig. 3C, accumulation levels of the GFP:Betv1 and GFP:TPC7 in  
228 most embryos were under detectable level, whereas the GFP:Mald1 highly accumulated  
229 in most embryos. These results are in contrast with that they accumulated at similar  
230 expression levels in their endosperm (Fig. 3B). Thus, difference in their accumulation levels  
231 in whole grains may be accounted for by their differences in embryos. On the other  
232 hand, when the GFP reporter containing the KDEL tag at its C terminus was directly  
233 expressed, it accumulated in both embryo and endosperm like the GFP:Mald1 construct  
234 (Fig. S2). These findings suggested that fusion to the Bet v 1 or TPC7 may give rise to  
235 unstability of their fusion products in embryos.

236 When accumulation levels of the GFP:Mald1 in mature seeds that were directed by the  
237 endosperm-specific glutelin *GluB-1* promoter were compared with those that were driven by  
238 the ubiquitin promoter, the endosperm-specific promoter led to higher levels of its  
239 accumulation (Fig. 3A). This result may reflect the difference in promoter activities of  
240 maturing seeds between them (Qu and Takaiwa, 2004).

241 Next, accumulation levels of the GFP:Mald1, GFP:Betv1 and GFP:TPC7 in leaves

242 and roots were examined by immunoblotting using anti-GFP antibody. It should be noted  
243 that these GFP fusion products with the size of 50kDa is processed (degraded) into 37-39  
244 kDa in vegetative tissues, when analyzed by immunoblotting using anti-GFP antibody. As  
245 shown in Fig. 4A, GFP:Mald1 highly accumulated in leaves and roots, whereas the  
246 accumulation levels of GFP:Betv1 and GFP:TPC7 were very low. Especially, their  
247 accumulation levels in roots were much lower than those of GFP:Mald1. These results  
248 suggested that the GFP:Betv1 and GFP:TPC7 products are unstable in vegetative  
249 tissues in a similar manner to their expression in their embryos. Therefore, the Mal d 1  
250 may act as stabilizing sequence by protecting fusion proteins from degradation or the Bet  
251 v 1 and TPC7 may cause instability in vegetative tissues.

252 When the transcript (mRNA) levels in leaf or roots between the Mal d 1 and Bet v 1 were  
253 examined by RT-PCR, there was little difference in their transcript levels between them,  
254 indicating that their accumulation levels are determined by post-transcriptional level (Fig.  
255 4B).

256

#### 257 **Subcellular localization of GFP:Mald1**

258 When the GFP:Mald1 was expressed under the control of the maize ubiquitin promoter, it  
259 was detected in the whole grain under blue UV fluorescence (Fig. 2C). When this  
260 transgenic rice seed was vertically sectioned and observed using the confocal laser  
261 scanning microscopy, high fluorescence signal of GFP was detected in aleurone layer and  
262 embryo (Fig. 2D). Then, the subcellular localization of GFP:Mald1 in various parts of  
263 transgenic rice seed was examined in detail by fluorescence of GFP reporter (Fig. 2E-H)  
264 or immuno-histochemical analysis by anti-GFP antibody (Fig. S3) using the confocal laser  
265 scanning microscope. In the aleurone cells, the GFP:Mald1 was shown to be  
266 predominantly localized in huge spherical protein bodies (PBs) with a diameter of  $>5 \mu\text{m}$   
267 (Fig. 2E-F), whereas in the starchy endosperm it was localized in PB-Is containing

268 prolamins and small granules with a size of  $\leq 1 \mu\text{m}$  (Fig. 2F, Fig. S3L). In the embryo of  
269 maturing seed, it was predominantly localized in ER lumen (Fig. 2H, Fig. S3H,K). To  
270 investigate the participation of chaperon proteins in huge PB formation, intracellular  
271 localization of several chaperon proteins was analyzed. As shown in Fig. S3 (A,B,D,I), BIP1,  
272 BiP4/5, PDIL1-1 and PDIL2-3 were co-localized in huge peripheral PBs in the aleurone cells,  
273 whereas they are also localized in ER lumen and PB-Is in the starchy endosperm. When  
274 antibodies against CNX (Fig. S3F), OsTiP3 (Fig. S3G) and Cys-rich 14kDa prolamin (RM1)  
275 (Fig.3SL) were used as markers for subcellular compartments of ER, protein storage  
276 vacuole (PB-II) and ER-derived PBs (PB-Is), respectively, they were not observed to be  
277 over-lapped with huge PBs. These results indicate that huge PBs accumulating  
278 GFP:Mald1 are formed by aid of BiPs and PDILs chaperone proteins.

279 Next, when intracellular localization of the GFP:Mald1 was examined in root, it was  
280 shown to be mainly localized as small granules in ER lumen (Fig. S4), since CNX,  
281 PDIL1-1, BIP1 were co-localized with the GFP:Mald1 at the peripheral sites of individual  
282 vegetative cell. Huge PBs could not be observed in root tissues. Strong fluorescence of GFP  
283 was observed at rooting site.

284

### 285 **Identification of regions of Mal d 1 responsible for stable accumulation in vegetative** 286 **tissues**

287 To investigate which domain(s) in the Mal d 1 molecule is involved in high and stable  
288 accumulation in vegetative tissues, the Mal d 1 was progressively deleted from the N  
289 or C termini and their resultant regions were fused to the GFP reporter as shown in Fig.  
290 5A. They were expressed under the control of the maize ubiquitin constitutive promoter.

291 When these fusion product levels were examined in vegetative tissues (leaf and roots) by  
292 immunoblotting using anti-GFP antibody, the regions of the Mal d 1 between positions 1-120,  
293 positions 41-159 and positions 41-120 conferred higher level of accumulation than the

294 regions between positions 81-120 and positions 81-159 (Fig. 5B). This result indicates  
295 that the region between positions 41-120 is critical to confer high level of accumulation in  
296 vegetative tissues. Then, to characterize the minimum region required for high expression in  
297 vegetative tissues, accumulation levels from the regions between positions 41-107,  
298 41-90 and 41-70 were examined. As shown in Fig 5C, the region between positions 41-90  
299 led to the highest accumulation level. Notably, further deletion of 20 amino acids (region  
300 between positions 41-70) or addition of 17 amino acids (region between positions 41-107)  
301 resulted in reduction of accumulation levels. These results indicate that the minimum region  
302 implicated in high accumulation in vegetative tissue is localized between positions 41-90.  
303 This region contains 'P-loop' (phosphate-binding loop) motif, (GxGGxGxxK) rich in glycine  
304 residue between positions 48-54 that is conserved in most of PR10 proteins (Fig. 1).  
305 In order to examine its function, this sequence (GNGGPGTIK) was substituted to  
306 ANAAPATIK. However, mutation of this sequence did not have any effect on  
307 accumulation levels of the linked GFP in most of leaves as well as seeds (Fig. S5). This  
308 result indicated that P-loop motif is not responsible for enhancing the accumulation level of  
309 the Mal d 1 in transgenic rice.

310 Next, it was examined how above deletions of the Mal d 1 have an effect on  
311 accumulation levels of the linked GFP in transgenic rice seeds (Fig. S6). Progressive  
312 deletion from the N terminus reduced the linked GFP accumulation levels (Fig. S6A). The  
313 region between positions 41-90 gave rise to higher level accumulation than the regions  
314 between positions 41-159, positions 41-120 and positions 41-70 (Fig. S6B). Furthermore,  
315 the region between positions 41-120 led to higher levels of accumulation than the  
316 regions between positions 81-120 and positions 1-120 (Fig. S6C). These results are  
317 fundamentally similar to those observed in vegetative tissues. Taken together, the region  
318 between positions 41-90 is involved in stable and high accumulation in seed as well as  
319 vegetative tissues.

320 **Domain swapping between the Mal d 1 and Bet v 1**

321 To identify the domain that is implicated in high accumulation in vegetative tissues of  
322 transgenic rice harboring GFP:Mald1, domain swapping was carried out between the Mal d  
323 1 and Bet v 1 as shown in Fig. 6A. When the C terminal regions of the Bet v 1 between  
324 positions 90-159 and positions 127-159 were exchanged with the corresponding regions of  
325 the Mal d 1, accumulation levels of these chimeric products (Bet:Mal90, Bet:Mal127) were  
326 very low in leaves like the native Bet v 1. That is, accumulation levels of these chimeric  
327 products were not significantly altered by fusion with the C terminal region of Mal d,  
328 indicating that the C terminal half region of the Mal d 1 has little enhancing effect. On the  
329 other hand, when the N terminal half region of Bet v 1 between positions 1 and 90 was  
330 exchanged with the corresponding region of the Mal d 1, much higher level of this chimeric  
331 product (Mal:Bet90) than the native Bet v 1 was observed in leaves. These findings  
332 indicated that the N terminal half region of the Mal d 1 is responsible for high  
333 accumulation of the Mal d 1 in vegetative tissues. Therefore, in order to ascertain that  
334 the region between positions 41-90 is critical for high accumulation in vegetative tissue,  
335 the corresponding region was mutually exchanged between the Mal d 1 and Bet v 1. The  
336 Bet:Mal:Bet chimeric product, in which the region between positions 41-90 was substituted  
337 with the corresponding region of the Mal d 1, gave rise to high levels of accumulation in  
338 leaves of most of transgenic lines, whereas the Mal:Bet:Mal chimeric product containing the  
339 Bet v 1 sequence between positions 41-90 resulted in lower levels of accumulation in  
340 most of transgenic rice leaves. These results indicated that the region between positions  
341 41-90 is mainly responsible for high accumulation in vegetative tissues of Mal d 1.

342

343 **Aggregation property of Mal d 1**

344 When the Mal d 1 containing KDEL ER retention tag was expressed under the control of the  
345 endosperm-specific glutelin *GluB-1* promoter, it was shown to be accumulated as an

346 oligomeric form in a similar manner to the TPC7 and Bet v 1 that are deposited into huge  
347 PBs in endosperm (Fig. 7).

348 Next, to examine whether there is a difference in oligomeric formation among various  
349 tissues, the oligomeric formation of the GFP:Mald1 directed by the glutelin  
350 endosperm-specific or ubiquitin constitutive promoter was compared by separation on 8%  
351 non-reduced native PAGE. As shown in Fig.7A, dimer of GFP:Mald1 fusion protein was  
352 observed in the extracts from these transgenic rice seed and leaf. Furthermore, higher  
353 aggregates such as trimer and tetramer were also observed by separation on 6%  
354 non-reducing native PAGE (Fig. 7B). Such aggregates are suggested to be formed by  
355 self-aggregation via disulfide bond, because there is only one free cysteine (Cys) residue  
356 in the Mad d 1 like the Bet v 1 and TPC7. Therefore, the Cys residue in the Mal d 1 was  
357 substituted to the Ala residue to eliminate the Cys residue, which was then produced as a  
358 fusion protein with GFP in transgenic rice. When this GFP:Mal<sub>C-A</sub> was extracted from  
359 seed and leaf and then analyzed by native PAGE, dimeric form of the modified Mal d 1 was  
360 observed irrespective of the absence of Cys residue (Fig. 7A line2 and 5). However, the  
361 migration of this aggregate was slightly different from that of the inherent one.

362 To examine whether this difference is attributed to the aggregate form, these GFP fusion  
363 proteins were extracted from transgenic seeds with different concentration of SDS (0.2%,  
364 0.5% and 1%(w/v)). The GFP:Mald1 could be extracted with all the concentrations of  
365 SDS used here, whereas the GFP:Madl<sub>C-A</sub> could not be extracted with 0.2% or 0.5% SDS  
366 buffer (Fig. 7D). This finding suggested that Cys free modified GFP:Mald1 is aggregated in  
367 different manner from the native one.

368

### 369 **Extraction of GFP:Mald1 from transgenic rice plants**

370 GFP:Mald1 was extracted from nature seed and leaf of transgenic rice plants with various  
371 extraction buffers. Different concentration of SDS (0.2% and 1%) and 1% Tween20 and

372 1%Triton-X100 were used for solubilizing membrane proteins. When expressed in the  
373 endosperm under the control of the glutelin promoter, higher concentration of SDS (1%) was  
374 required for its extraction from mature seed. However, this extraction efficiency was much  
375 lower than the SDS-urea buffer. On the other hand, when expressed under the control of  
376 the ubiquitin promoter, it could be easily extracted from seed and leaf with all types of buffer  
377 used here. It is notable that extraction efficiency was almost same to the SDS-urea buffer.  
378 These results may be related to that the GFP:Mald1 directed by the maize ubiquitin  
379 promoter is localized in aleurone layer of seed and in ER lumen of leaf.

380 Next, to examine the cause of low extraction efficiency of GFP:Mald1 from transgenic  
381 rice seed that was directed by the endosperm-specific glutelin promoter, mature seed was  
382 treated with various extraction buffers containing reducing agent (10mM DTT) and various  
383 detergents. As shown in Fig. 8B, extraction efficiency of the GFP:Mald1 was  
384 improved by the presence of reducing agent (DTT). Furthermore, there is little difference  
385 in extraction efficacy by the presence or absence of KDEL ER retention sequence.  
386 These results suggest that the Mal d 1 interacts with Cys-rich prolamins via disulfide bond in  
387 starchy endosperm.

388

## 389 Discussion

390 TPC7 and TPC 9 are derivatives of major birch pollen allergen Bet v 1, which have been  
391 developed through *in vitro* random recombination by means of DNA shuffling as versatile  
392 recombinant hypoallergenic allergen against multiple Fagales pollen allergens (Wallner *et*  
393 *al.* 2007). Since the TPC7 and TPC9 exhibit lower allergenicity and higher immunogenicity  
394 than the native Bet v 1, they are expected to act as the ideal tolerogens for  
395 allergen-specific immunotherapy against the major pollen allergens of trees belonging to the  
396 Fagales order Bet v 1 family. Therefore, to create rice seed-based oral allergy vaccine  
397 against the pollen allergy of Fagales order, we have generated transgenic rice

398 accumulating the Bet v 1 and its derivatives, TPC7 and TCP9. We previously reported that  
399 high amounts of TPC7 (540 ug/seed) and native Bet v 1 were deposited in spherical  
400 huge protein bodies in endosperm cells of transgenic rice seeds, when expressed as  
401 secretory protein under the control of glutelin endosperm-specific promoter (Wang *et al.*  
402 2013; Ogo *et al.* 2014).

403 It has been reported that more than 70% of birch pollen allergy patients develop an  
404 IgE-mediated hypersensitivity reaction termed as OAS after apple consumption  
405 (Geroldinger-Simic *et al.*, 2011). This is mainly attributed to the immunological  
406 cross-reaction between the Bet v 1 specific IgE and apple major allergen Mal d 1, because  
407 the Bet v 1 and Mal d 1 share high homology in the primary sequence. Pollen allergen Bet  
408 v 1 is specifically expressed in pollen, while food allergen Mal d 1 is expressed in  
409 vegetative tissues. Therefore, it is important to examine how these allergens are deposited  
410 in various tissues of transgenic rice, when these allergens are produced in transgenic rice  
411 and then used as rice-based allergy vaccines against these pollen and food allergy  
412 diseases.

413 As shown in Fig. 3, when the GFP:Betv1, GFP:TPC7 and GFP:Mald1 were expressed  
414 as secretory protein by ligating the N terminal signal peptide and C terminal KDEL tag  
415 under the control of the maize ubiquitin promoter, accumulation levels of GFP:Betv1 and  
416 GFP:TPC7 were very low in various vegetative tissues such as leaf, root and seed embryo  
417 except for seed (endosperm). In contrast, the GFP:Mald1 highly accumulated not only in  
418 seed, but also in leaf and root. When intracellular localization of the GFP:Mald1 was  
419 examined in maturing transgenic seeds, it is mainly deposited in huge PBs in aleurone  
420 cells and in ER-derived PBs (PB-Is) containing prolamin storage proteins in starchy  
421 endosperm cells. This accumulation pattern was remarkably different from that directed by  
422 rice endosperm-specific glutelin promoter, in which the GFP:Mald1 is predominantly  
423 deposited in huge PBs in the starchy endosperm cells. On the other hand, huge PBs were



424 not observed in vegetative tissues, although high amounts of GFP:Mald1 accumulate in  
425 vegetative tissues. Then, taking these results into consideration, we examined why the  
426 GFP:Mald1 can be deposited into huge bodies in aleurone cells, but not in  
427 endosperm and vegetative tissues under the control of the maize ubiquitin promoter.

428 It has been suggested that huge PB formation is associated with the aggregate property  
429 of the recombinant proteins (Ogo *et al.*, 2014). Furthermore, expression levels may be  
430 also important for the formation of huge PBs, since maize ubiquitin promoter directs stronger  
431 expression in aleurone layer than in starchy endosperm of maturing seed, when examined  
432 by expression of the GUS reporter gene driven by the same maize ubiquitin promoter  
433 (Takaiwa *et al.*, 2007). Requirement for high accumulation of recombinant proteins above  
434 a threshold level has been pointed out for the formation of PB in elastin-like polypeptide  
435 (ELPs) and hydrophobin fusion proteins (Gutierrez *et al.*, 2013).

436 PB formation is suggested to be efficiently initiated by ER retention via the C terminal  
437 KDEL signal of GFP:Mald1. Actually, localization of GFP:Mald1 in ER lumen is observed in  
438 various tissues including aleurone layer and seed embryo, since small granules with green  
439 fluorescence are observed along ER membrane network all over the whole cell, which are  
440 connected as ER network. That is, the GFP:Mald1 is synthesized on rough ER, and  
441 subsequently transferred into the ER lumen. The size of PB gradually increases  
442 through binding of small aggregates, resulting in generation of huge spherical PB with a  
443 maximum size of >10  $\mu\text{m}$ . As shown in Fig. 9, a single or a few huge spherical PBs are  
444 finally formed by gathering several small size GFP:Mald1 aggregates in one cell.  
445 Aggregates are observed to be concentrated into a single huge PB through ER network  
446 connection. Finally, a single huge spherical PB is formed in many aleurone cells.  
447 Growth in PB size is accompanied by an increase in accumulation levels. Furthermore, PB  
448 formation is known to be mediated by aid of some chaperon proteins such as BiPs and  
449 PDILs that are implicated in folding and assembly. When subcellular localization of some

450 BiPs and PDILs were examined by immuno-histochemical analysis, these chaperons are  
451 localized within huge PBs containing GFP:Mald1 as shown in Fig. S5, indicating that huge  
452 PBs in aleurone cells are formed in a similar manner as huge PBs observed in the  
453 starchy endosperm (Ogo *et al.* 2014). Aleurone cells are rich in protein storage vacuoles  
454 (PSVs) referred as aleurone bodies and lipid bodies. Some storage proteins such as rice  
455 embryo globulin-2 proteins (REG2) and phytic acid are accumulated inside aleurone bodies.  
456 Antibodies against OsTIP3 and CNX as PSV and ER marker are not localized to huge PBs  
457 in the aleurone cells. Huge PBs are suggested to be independently formed by  
458 self-aggregation of Mal d 1. Generation mechanism of this huge PB is fundamentally  
459 same to that of Zera, ELPs and hydrophobin-I in plant cells (Conley *et al.*, 2011;  
460 Saberianfar and Menassa, 2017).

461 Bet v 1 and Mal d 1 belong to the same PR10 group and share about 55-68% amino acid  
462 sequence homology to each other. However, it is notable that their accumulation levels  
463 in various tissues are quietly different even when expressed under the control of the same  
464 constitutive ubiquitin promoter. The GFP:Mald1 highly accumulates in various vegetative  
465 tissues and seed, whereas high accumulation of the GFP:Betv1 is limited to the endosperm  
466 and its accumulation level in the vegetative tissues is relatively low. It is notable that  
467 transcript levels between the GFP:Mald1 and GFP:Betv1 in leaves and roots are almost  
468 same, when examined by RT-PCR using GFP primers. Post-translational regulation is  
469 involved in such difference in accumulation levels. Non-correlationship between transcript  
470 levels and accumulation products have been reported for several seed storage proteins in  
471 maize aleurone cells (Reyes *et al.*, 2011). By contrast, foreign recombinant protein such as  
472 7Crp peptide selectively accumulated in endosperm rather than other tissues (embryo and  
473 vegetative tissues) when expressed under the constitutive promoter (Takaiwa *et al.*, 2007).  
474 Difference in intracellular localization or post-translational modification such as glycosylation  
475 may be also implicated in such post-translational regulation.

476 In this study, we first demonstrated by deletion analysis of the Mal d 1 that the region  
477 between positions 41-90 is mainly responsible for high and stable accumulation in  
478 vegetative tissues. Participation of this region in high accumulation in vegetative tissues  
479 was further confirmed by domain swapping between the Mal d 1 and Bet v 1. As shown  
480 in Fig. 6, the exchange of this Mal d 1 region between positions 41-90 with the  
481 corresponding region of Bet v 1 (Bet:Mal:Bet) resulted in higher accumulation of the linked  
482 GFP in vegetative tissue than the native Bet v 1. This region includes very conserved P  
483 element motif and N-glycosylation site of Bet v 1 and TPC7. Moreover, we previously  
484 reported by domain swapping between TPC7 and Bet v 1 that the sequence between  
485 positions 32-160 is important for the formation of huge and high number of PBs (Ogo *et al.*,  
486 2014). This result also supports the contribution of C terminal half region to the huge PB  
487 formation. Furthermore, this region has been suggested to be involved in immunological  
488 cross-reactivity between Mal d 1 and Bet v 1, since this region was identified as  
489 conformational B-cell epitope (discontinuous epitopes) by antibody binding (Mirza *et al.*,  
490 2000). This epitope is formed by the segment between Glu42 and Thr52 along with Arg70,  
491 Asp72, His76, Ile86 and Lys97 of Bet v 1. The tertiary structure of this region exhibits  
492 antiparallel  $\beta$ -sheet structure ( $\beta$ -2,  $\beta$ -3,  $\beta$ -4 and  $\beta$ -5), which covers a large proportion of  
493 the inner cavity surface (Ahammer *et al.*, 2017). Mutagenesis of conserved amino acid  
494 within this region (E45S) also reduced IgE binding (Spangfort *et al.*, 2003). These  
495 evidences also suggest that the region between positions 41-90 is structurally important and  
496 is localized on the protein surface of the Mal d 1..

497 When the GFP:Mald1 was specifically expressed under the control of the  
498 endosperm-specific promoter, it was difficult to extract it from mature seed. This is due to  
499 that it is deposited into huge ER-derived PBs by self-aggregation or PB-Is by interaction  
500 with Cys-rich prolamins via disulfide bonds (Takaiwa *et al.*, 2009). Higher concentration of  
501 detergent (SDS) and reducing agent (DTT) are required for efficient extraction of Mal d 1

502 from transgenic rice seed. By contrast, when expressed under the control of the constitutive  
503 promoter, the GFP:Mald1 can be easily extracted from various tissues. Especially, it  
504 can be extracted from transgenic mature seeds even with saline solution. This can be  
505 explained by the observation that the GFP:Mald1 is localized in ER lumen of vegetative  
506 tissue or accumulated mainly in huge PBs of aleurone cells.

507 Bet v 1 has been reported to generally form a mixture of monomers, dimers and higher  
508 order oligomers (Scholl *et al.*, 2005). Dimerization was also reported for Mal d 1 (Ma *et al.*,  
509 2006). When GFP:Mald1 was produced in transgenic rice, it displays multimeric formation in  
510 seed and vegetative tissues (Fig. 8). The Mal d 1 has one cysteine residue like the Bet v  
511 1. This cysteine residue is suggested to be implicated in disulfide bond formation for  
512 self-aggregation or interaction with the Cys-rich prolamins in transgenic rice seeds.  
513 However, even though this cysteine residue was substituted to Ala by mutagenesis,  
514 oligomeric (dimeric) formation was retained. Notably, this mutagenesis resulted in the  
515 alternation in physicochemical property of the accumulated modified Mal d 1, since it  
516 became difficult to extract the mutagenized Mal d 1 from vegetative tissues. The  
517 mutagenized Mal d 1 lacking Cys residue suggested to be falsely folded, leading to  
518 change in physicochemical property of Mal d 1. Therefore, cysteine residue in Mal d 1  
519 molecules may be critical for the correct folding or oligomeric formation via disulfide bond.

520 It has been demonstrated in this study that localization and generation of such huge  
521 PBs in transgenic rice are dependent on the tissue specificity and strength of the  
522 promoter used for expression. When directed by the maize ubiquitin constitutive promoter,  
523 huge PBs are observed to be formed mainly in aleurone cells, whereas expression by the  
524 endosperm-specific glutelin promoter gives rise to their production in starchy endosperm.  
525 Higher expression above a threshold level is essentially required for huge PB formation.  
526 However, although many various foreign recombinant proteins have been produced in our  
527 laboratory, such huge PBs could not be formed except for the PR10 proteins such as Bet v 1

528 and Mal d 1 even when the same strong endosperm-specific promoter has been utilized,  
529 suggesting that the specific physicochemical property such aggregation property may be  
530 associated with the huge PB formation. Their tertiary structure leading to high aggregates  
531 may be responsible for the huge PB formation by helping to increase the accumulation  
532 levels. When the GFP was produced by fusion with Mal d 1, it was highly and stably  
533 accumulated not only in seed, but also in leaf and root (Fig. S7). Notably, accumulation  
534 level of GFP has been significantly increased by fusion with Mal d 1. Furthermore,  
535 GFP:Mald1 fusion protein can be more easily extracted from various tissues of transgenic  
536 rice than that specifically expressed in transgenic rice seeds. Therefore, Mal d 1 may be  
537 utilized as fusion partner for the production of high-value recombinant proteins in plant like  
538 Zera and ELPs. Further works will be required whether production of foreign recombinant  
539 proteins can be enhanced by fusion with Mal d 1.

540

#### 541 **Acknowledgments**

542 We thank Ms. K. Miyashita, Y. Ikemoto and Y. Yajima for technical assistance and Dr.  
543 Kenjiro Ozawa for encourage of this research.

544

#### 545 **References**

- 546 **Agarwall P, Agarwal PK.** 2014. Pathogenesis related-10 proteins are small, structurally  
547 similar but with diverse role in stress signaling. *Molecular Biology Reports* **41**, 599-611.
- 548 **Ahammer L, Grutsch S, Kamenik AS, Liedl KR, Tollinger M.** 2017. Structure of the Major  
549 Apple Allergen Mal d 1. *Journal of Agricultural and Food Chemistry* **65**, 1606-1612.
- 550 **Beuning L, Bowen J, Persson H, Barraclough D, Bulley S, Macrae E.** 2004.  
551 Characterisation of Mal d 1-related genes in Malus. *Plant Molecular Biology* **55**,  
552 369-388.
- 553 **Conley AJ, Joensuu JJ, Richman A, Menassa R.** 2011. Protein body-inducing fusions for  
554 high-level production and purification of recombinant proteins in plants. *Plant*  
555 *Biotechnology Journal* **9**, 419-433
- 556 **Ebner C, Birkner T, Valenta R, Rumpold H, Breitenbach M, Scheiner O, Kraft D.** 1991.  
557 Common epitopes of birch pollen and apples – studies by western and northern blot.  
558 *Journal Allergy and Clinical Immunology* **88**, 588-594.

- 559 **Fernandes H, Michalska K, Sikorski M, Jaskolski M.** 2013. Structural and functional  
560 aspects of PR-10 proteins FEBS Journal **280**, 1169-1199.
- 561 **Fritsch R, Bohle B, Vollmann U, Wiedermann U, Jahn-Schmid B, Krebitz M,**  
562 **Breiteneder H, Kraft D, Ebner C.** 1998. Bet v 1, the major birch pollen allergen,  
563 and Mal d 1, the major apple allergen, cross-react at the level of allergen-specific T  
564 helper cells. Journal Allergy and Clinical Immunology **102**, 679–686.
- 565 **Geroldinger-Simic M, Zelniker T, Aberer W. et al.** 2011. Birch pollen-related food  
566 allergy: Clinical aspects and the role of allergen-specific IgE and IgG4 antibodies.  
567 Journal of Allergy and Clinical Immunology **127**, 616–622.
- 568 **Goto F, Yoshihara T, Sugimoto N, Toki S, Takaiwa F.** 1999. Iron fortification of rice seed  
569 by the soybean ferritin gene. Nature Biotechnology **17**, 282-286.
- 570 **Gutiérrez SP, Saberianfar R, Kohalmi SE, Menassa R.** 2013. Protein body formation in  
571 stable transgenic tobacco expressing elastin-like polypeptide and hydrophobin fusion  
572 proteins. BMC Biotechnology **13**, 40.
- 573 **Hofbauer A, Stoger E.** 2013. Subcellular accumulation and modification of pharmaceutical  
574 proteins in different plant tissues. Current Pharmaceutical Design **19**, 5495-5502.
- 575 **Holm J, Ferreras M, Ipsen H, Wurtzen PA, Gajhede M, Larsen JN, Lund K.**  
576 2011. Spangfort, M. D. Epitope grafting, re-creating a conformational Bet v 1 antibody  
577 epitope on the surface of the homologous apple allergen Mal d 1. Journal of Biological  
578 Chemistry **286**, 17569–17578.
- 579 **Liu J, Ekramoddoullah AKM.** 2006. The family 10 of plant pathogenesis-related proteins:  
580 Their structure, regulation, and function in response to biotic and abiotic stresses. Physiol  
581 Molecular Plant Pathology **68**, 3-13.
- 582 **Ma Y, Gadermaier G, Bohle B, Bolhaar S, Knulst A, Markovic-Housley Z, Breiteneder H,**  
583 **Briza P, Hoffmann-Sommergruber K, Ferreira F.** 2006. Mutational analysis of amino  
584 acid positions crucial for IgE-binding epitopes of the major apple (*Malus domestica*)  
585 allergen, Mal d 1. International Archives of Allergy and Immunology **139**, 53–62.
- 586 **Mari A, Ballmer-Weber BK, Vieths S.** 2005. The oral allergy syndrome: improved  
587 diagnostic and treatment methods. Current Opinion in Allergy and Clinical Immunology. **5**,  
588 267–273.
- 589 **Marzban G, Puehringer H, Dey R, et al.** 2005. Localisation and distribution of the major  
590 allergens in apple fruits. Plant Science **169**, 387–394.
- 591 **Mirza O, Henriksen A, Ipsen H, Larsen JN, Wissenbach M, Spangfort MD, Gajhede M.**  
592 2000. Dominant epitopes and allergic cross-reactivity: complex formation between a Fab  
593 fragment of a monoclonal murine IgG antibody and the major allergen from birch pollen  
594 Bet v 1. Journal of Immunology **165**, 331-338.
- 595 **Ogo Y, Takahashi H, Wang S, Takaiwa F.** 2014, Generation mechanism of novel, huge  
596 protein bodies containing wild type or hypoallergenic derivatives of birch pollen allergen  
597 Bet v 1 in rice endosperm. Plant Molecular Biology **86**, 111-123.
- 598 **Oono Y, Wakasa Y, Hirose S, Yang L, Sakuta C, Takaiwa F.** (2010) Analysis of ER stress

- 599 in developing rice endosperm accumulating  $\beta$ -amyloid peptide. *Plant Biotechnology*  
600 *Journal* **8**, 691-718.
- 601 **Pagliarani G, Paris R, Arens P, Tartarini S, Ricci G, Smulders MM, van de Weg WE.**  
602 2013. A qRT-PCR assay for the expression of all Mal d 1 isoallergen genes.  
603 *BMC Plant Biology* **23**, 13:51.
- 604 **Rouvinen J, Jänis J, Laukkanen ML, Jylhä S, Niemi M, Päivinen T, Mäkinen-Kiljunen S,**  
605 **Haahtela T, Söderlund H, Takkinen K.** 2010. Transient dimers of allergens. *PLoS*  
606 *One* **5**, e9037.
- 607 **Puehringer H, Moll D, Hoffmann-Sommergruber K, Watillon B, Katinger H, Machado**  
608 **MLD.** 2000. The promoter of an apple Ypr10 gene, encoding the major allergen Mal d 1,  
609 is stress- and pathogen-inducible. *Plant Science* **152**, 35–50.
- 610 **Qu LQ, Takaiwa F.** 2004. Evaluation of tissue specificity and expression strength of rice  
611 seed component gene promoters in transgenic rice. *Plant Biotechnology Journal* **2**,  
612 113-125.
- 613 **Reyes FC, Chung T, Holding D, Jung R, Vierstra R, Otegui MS.** 2011. Delivery of  
614 prolamins to the protein storage vacuole in maize aleurone cells. *Plant Cell.* **23**, 769-784.
- 615 **Saraste M, Sibbald PR, Wittinghofer A.** 1990. The P-loop- a common motif in ATP-and  
616 GTP-binding proteins. *Trends in Biochemical Sciences* **15**, 430-434.
- 617 **Saberianfar R, Menassa R.** 2017. Protein bodies: how the ER deals with high accumulation  
618 of recombinant proteins. *Plant Biotechnology Journal* **15**, 671-673.
- 619 **Scholl I, Kalkura N, Shedziankova. et al.** 2005. Dimerization of the major birch pollen  
620 allergen Bet v 1 is important for its in vivo IgE-cross-linking potential in mice. *Journal of*  
621 *Immunology* **175**, 6645-6650.
- 622 **Spangfort MD, Mirza O, Ipsen H, Van Neerven RJ, Gajhede M, Larsen JN.** 2003.  
623 Dominating IgE-binding epitope of Bet v 1, the major allergen of birch pollen,  
624 characterized by X-ray crystallography and site-directed mutagenesis. *Journal of*  
625 *Immunology* **171**, 3084-3090.
- 626 **Stoger E, Ma JK, Fischer R, Christou P.** 2005. Sowing the seeds of success:  
627 pharmaceutical proteins from plants. *Current Opinion in Biotechnology* **16**, 167-173.
- 628 **Tada Y, Utsumi S, Takaiwa F.** 2003. Foreign gene products can be enhanced by  
629 introduction into storage protein mutants. *Plant Biotechnology Journal* **1**, 411-422.
- 630 **Takaiwa F, Kikuchi S, Oono K.** 1987. A rice glutelin gene family-A major type of glutelin  
631 mRNAs can be divided into two classes. *Molecular General Genetics* **208**, 15-22.
- 632 **Takaiwa F, Takagi H, Hirose S, Wakasa Y.** 2007. Endosperm tissue is good production  
633 platform for artificial recombinant proteins in transgenic rice. *Plant Biotechnology*  
634 *Journal* **5**, 84-92.
- 635 **Takaiwa F, Hirose S, Takagi H, Yang L, Wakasa Y.** 2009. Deposition of a recombinant  
636 peptide in ER-derived protein bodies by retention with cysteine-rich prolamins in  
637 transgenic rice seed. *Planta* **229**, 1147–1158.
- 638 **Takaiwa F.** 2013. Update on the use of transgenic rice seeds in oral immunotherapy.

639 Immunotherapy **5**, 301-312.

640 **Takaiwa F, Wakasa Y, Takagi H, Hiroi T.** 2015. Rice seed for delivery of vaccines to gut  
641 mucosal immune tissues. *Plant Biotechnology Journal* **13**, 1041-1055.

642 **Takaiwa F, Yang L, Maruyama N, Wakasa Y, Ozawa K.** 2016. Deposition mode of  
643 transforming growth factor- $\beta$  expressed in transgenic rice seed. *Plant Cell Reports* **35**,  
644 2461-2473.

645 **Takaiwa F, Wakasa Y, Hayashi S, Kawakatsu T.** 2017. An overview on the strategies to  
646 exploit rice endosperm as production platform for biopharmaceuticals. *Plant Science* **263**,  
647 201-209.

648 **Wakasa Y, Yasuda H, Takaiwa F.** 2006. High accumulation of bioactive peptide in  
649 transgenic rice seeds by expression of introduced multiple genes. *Plant*  
650 *Biotechnology Journal* **4**, 499–510.

651 **Wakasa Y, Hayashi S, Takaiwa F.** (2012) Expression of OsBiP4 and OsBiP5 is highly  
652 correlated with the endoplasmic reticulum stress response in rice. *Planta* **236**, 1519-1527

653 **Wallner M, Stöcklinger A, Thalhamer T, et al.** 2007. Allergy multivaccines created by  
654 DNA shuffling of tree pollen allergens. *Journal of Allergy and Clinical Immunology* **120**,  
655 374-380.

656 **Wang S, Takahashi H, Kajiura H, Kawakatsu T, Fujiyama K, Takaiwa F.** 2013. Transgenic  
657 rice seeds accumulating recombinant hypoallergenic birch pollen allergen Bet v 1  
658 generate giant protein bodies. *Plant and Cell Physiology* **54**, 917-933.

659 **Yasuda H, Hayashi Y, Jomori T, Takaiwa F.** 2006. The correlation between expression and  
660 localization of a foreign gene product in rice endosperm. *Plant and Cell Physiology* **47**,  
661 756-763

662 **Yasuda H, Hirose S, Kawakatsu T, Wakasa Y, Takiwa F.** 2009. Overexpression of BiP has  
663 inhibitory effects on the accumulation of seed storage proteins in endosperm cells of rice.  
664 *Plant and Cell Physiology* **50**, 1532-1543.

665

666

667

668

669

670

671

672

673

674



675 **Legends of figures**

676 **Figure 1. Gene constructs used for expression of Mal d 1, Bet v 1 and TPC7 in**  
677 **transgenic rice. (A)** Alignment of Mal d 1, Bet v 1 and TPC7 amino acid sequences.  
678 Cysteine residue and glycosylation sites are indicated by red and green colors. Red square  
679 represents P loop motif. **(B)** Schematic representation of the gene constructs used for  
680 expression of GFP, GFP:Mald1, GFP:Betv1 and GFP:TPC7 in transgenic rice. Mal d 1,  
681 Bet v 1 and TPC7 were expressed as fusion proteins with GFP under the control of the 2.3  
682 kb glutelin *GluB-1* promoter and maize ubiquitin promoter. SP and *GluB-1* T represent the  
683 glutelin B1 signal peptide sequence and 0.65 kb 3' untranslated region of *GluB-1*,  
684 respectively. KDEL, endoplasmic reticulum retention signal; HPT, hygromycin  
685 phosphotransferase gene; CaMV35S P, cauliflower mosaic virus 35S promoter; UbiP,  
686 maize ubiquitin gene promoter; RB, right border; LB, left border

687

688 **Figure 2. Expression pattern of GFP:Mald1 in transgenic rice seed. (A and B)**  
689 Intracellular localization of GFP:Mald1 in transgenic rice seed harboring the GluP::GFP:Mal  
690 or GluP::GFP:Mal(-KDEL). **(C-H)** Expression pattern of GFP:Mald1 of transgenic rice seeds  
691 harboring UbiP::GFP:Mal and its intracellular localization in aleurone layers, starchy  
692 endosperm and embryo. ALU, aleurone layer; END, endosperm; EMB, embryo; p,  
693 pericalp thin Bars= 5  $\mu$ m. thick Bars=100  $\mu$ m

694

695 **Figure 3. Immunoblot analysis of GFP:Mald1, GFP:Betv1 and GFP:TPC7 expressed**  
696 **in transgenic rice seeds under the control of the maize ubiquitin promoter.**  
697 GFP:Mald1 was also expressed under the control of the glutelin *GluB-1* promoter for  
698 comparison. Total proteins were extracted from the whole seed **(A)**, endosperm **(B)** and  
699 embryo **(C)** with SDS-urea buffer, and subsequently separated by 13% SDS-PAGE.  
700 Accumulation levels were examined by immunoblotting with anti-GFP antibody. GFP fusion

701 products with the predicted size of 50 kDa are indicated by arrow head. Degradation  
702 products of about 37 kDa and 20 kDa are detected in high expression lines.

703

704 **Figure 4. Expression of GFP:Mald1, GFP:Betv1 and GFP:TPC7 in leaf and roots of**  
705 **transgenic rice lines. (A)** Immunoblot analysis of GFP:Mald1, GFP:Betv1 and  
706 GFP:TPC7 expressed in leaf and roots of transgenic rice lines under the control of the  
707 maize ubiquitin promoter. Processed 37-38 kDa fragments are indicated by arrow head. **(B)**  
708 RT-PCR of GFP:Mald1 and GFP:Betv1 transcripts in leaf and roots. Total RNAs were  
709 extracted from leaf and roots. The 17S rRNAs were used for normalization of starting RNA  
710 concentration in RT-PCR analysis.

711

712 **Figure 5. Deletion analysis of Mal d 1 molecule. (A)** Schematic representation of the  
713 gene constructs used for deletion analysis of Mal d 1.  $\alpha$ ,  $\alpha$  helical structure;  $\beta$ ,  $\beta$   
714 sheet structure **(B-C)** Effect of deleted Mal d 1 on accumulation levels of linked GFP in leaf  
715 and roots of transgenic rice. Total proteins extracted from leaves and roots of 4-5  
716 representative independent transgenic lines for each expression construct were subjected  
717 to immunoblot analysis using anti-GFP antibody.

718

719 **Figure 6. Domain swapping between the Mal d 1 and Bet v 1. (A)** Schematic  
720 representation of gene constructs used for domain swapping. **(B-C)** Immunoblot analysis  
721 of various fusion products extracted from mature seeds and leaves of transgenic rice plants  
722 harboring various expression constructs using anti-GFP antibody.

723

724 **Figure 7. Comparison of aggregation property between GFP:Mald1 and GFP:Mald1<sub>C-A</sub>.**  
725 **(A)** Immunoblot analysis of GFP:Mald1 and GFP:Mald1<sub>C-A</sub> expressed in transgenic rice  
726 seeds and leaves. They were extracted with 50mM Tris-HCl (pH7.5) and 1%SDS without

727 reducing agent and then separated by 8% SDS-PAGE. 1. Seed extract from transgenic  
728 rice harboring GluP::GFP:Mal 2. Seed extract from transgenic rice harboring  
729 UbiP::GFP:Mal<sub>C-A</sub> 3. Leaf extract from transgenic rice harboring UbiP::GFP:Mal, 4. Leaf  
730 extract from transgenic rice harboring UbiP::GFP:Mald1<sub>C-A</sub>. 5 and 6. Seed extracts of  
731 GluP::GFP:Mal and UbiP::GFP:Mal were treated with reducing agent before loading to  
732 SDS-PAGE. Aggregates were detected by immunoblotting using anti-GFP antibody **(B)**  
733 Separation of seed extracts of transgenic rice harboring GluP::GFP:Mal (1) and  
734 UbiP::GFP:Mal (2) by 6% SDS-PAGE. **(C)** Comparison of accumulation levels in  
735 transgenic rice seeds between GFP:Mald1 and GFP:Mald1<sub>C-A</sub>. **(D)** Difference in  
736 extraction efficiency from mature seeds and leaves of transgenic rice harboring  
737 UbiP::GFP:Mal and UbiP::GFP:Mal<sub>C-A</sub> that were treated with 0.2%SDS (1), 0.5%SDS (2)  
738 and 1%SDS (3) in 50mM Tris-HCl (pH7.5). EXT, extracted; PPT, not extracted Arrow  
739 head represents the expressed GFP:Mald1 and GFP:Mald1<sub>C-A</sub>.

740

741 **Figure 8. Extraction of GFP:Mald1 from seed and leaves of transgenic rice. (A)** Seed  
742 powder and frozen leaf powder of transgenic rice harboring GluP::GFP:Mal or  
743 UbiP::GFP:Mal construct were treated with saline buffer (1) and saline buffer containing  
744 0.2% SDS (2) 1% SDS (3) 1% TritonX-100 (4) and 1%Tween-20 (5) and urea-SDS  
745 buffer (6) **(B)** Seed powder of transgenic rice harboring GluP::GFP:Mal or  
746 GluP::GFP:Mal-KDEL) was treated with saline solution containing 1%CTAB (1), 10mM DTT  
747 (2), 1% SDS (3), 0.2% SDS and 10mM DTT (4), 0.5% SDS and 10mM DTT (5), 1% SDS  
748 and 10mM DTT (6), 6M urea and 10mM DTT (7) and urea-SDS buffer (8). Extraction  
749 efficiency by these treatments was examined by immunoblotting using anti-GFP and  
750 anti-GluA antibodies.

751

752 **Figure 9. Subcellular localization of GFP:Mald1 in aleurone cells.** Green

753 fluorescence by GFP represents the localization of GFP/Mald1. Red represents the  
754 rhodamine B stained particles. **(A)** Ventral site of sectioned seed **(B)** Dorsal site of  
755 sectioned seed **(C-F)** Huge PB formation process of GFP:Mald1 in aleurone layer. ALU,  
756 aleurone layer; END, endosperm; EMB, embryo; OV, ovular vascular trace. Thick bars=  
757 200  $\mu\text{m}$  Thin bars= 5  $\mu\text{m}$

758

759

## 760 **Supplementary Figures**

761

762 **Figure S1. Immunoblot analysis of GFP:Mald1 fusion proteins expressed in**  
763 **transgenic rice seeds under the control of the endosperm-specific glutelin 2.3 kb**  
764 ***GluB-1* promoter.** Total proteins were extracted from mature seeds with SDS-urea  
765 buffer, and then separated by 13% SDS-PAGE. Proteins were visualized with CBB  
766 staining and accumulation level of GFP:Mald1 was analyzed by immunoblotting using  
767 anti-GFP or anti-TPC7 antibody. Effect on expression of chaperon proteins by accumulation  
768 of GFP:Mald1 were examined by immunoblotting using several anti-chaperone proteins.

769

770 **Figure S2. Immunoblot analysis and SDS-PAGE of GFP containing KDEL tag**  
771 **expressed as secretory protein in transgenic rice seed under the control of the**  
772 **ubiquitin promoter.** GFP accumulates in both embryo and endosperm of mature seed.

773

774 **Figure S3. Subcellular localization of GFP:Mald1 in aleurone and starchy**  
775 **endosperm cells in maturing seeds at 15-18 DAFs.** Green signal indicates GFP  
776 fluorescence or immunofluorescence of GFP immune-stained with anti-GFP antibody.  
777 Red signal indicates immunofluorescences of OSBiP-1, OSBiP4/5, OSPDIL1-1,  
778 OSPDIL2-3, CNX, OsTiP3 and RM1 (Cys-rich 14kDa prolamin) immunostained with their

779 specific anti-rabbit antibodies. Signals were detected using second antibody with the  
780 Alexa-488-conjugated goat anti-mouse IgG (green) and Alexa-564-conjugated goat  
781 anti-rabbit IgG (red). The images correspond to the merge channels resulting from the  
782 combination of anti-mouse IgG recognizing GFP (green) and anti-rabbit IgG recognizing  
783 chaperons (red). Co-localization is represented by yellow or orange color. Scale bars are  
784 5  $\mu$ m. ALU, alurone layer; END, endosperm; EMB, embryo

785

786 **Figure S4. Intracellular localization of GFP/Mald1 and various chaperone proteins in**  
787 **root tissue.** Transverse section of transgenic rice root. The images correspond to the  
788 merged channel resulting from the combination of GFP of GFP:Mald1 (shown in green) and  
789 chaperon proteins (shown in red). Colocalization is shown in orange. Bars 5  $\mu$ m

790

791 **Figure S5. Effect of mutation of Mal d 1 P-loop motif on accumulation level in**  
792 **leaf and seed.** P-loop motif of Mal d 1 was mutagenized and this modified Mal d 1 was  
793 expressed as fusion protein with GFP in leaves and seeds of several independent  
794 transgenic rice lines (GFP:Mal(P)). Accumulation levels in these leaves and mature seeds  
795 were compared with those of GFP:Mald1 as control.

796

797 **Figure S6. Effect of deleted Mal d 1 on accumulation levels of linked GFP in seeds of**  
798 **transgenic rice.** Total proteins extracted from mature seeds of 4-5 representative  
799 independent transgenic lines for each expression construct were subjected to immunoblot  
800 analysis using anti-GFP antibody

801

802 **Figure S7. Comparison of accumulation levels of GFP, GFP:Betv1 and GFP:Mald1 in**  
803 **leaf and seed.** GFP, GFP:Betv1 and GFP:Mald1 were expressed under the control of the  
804 maize ubiquitin promoter.

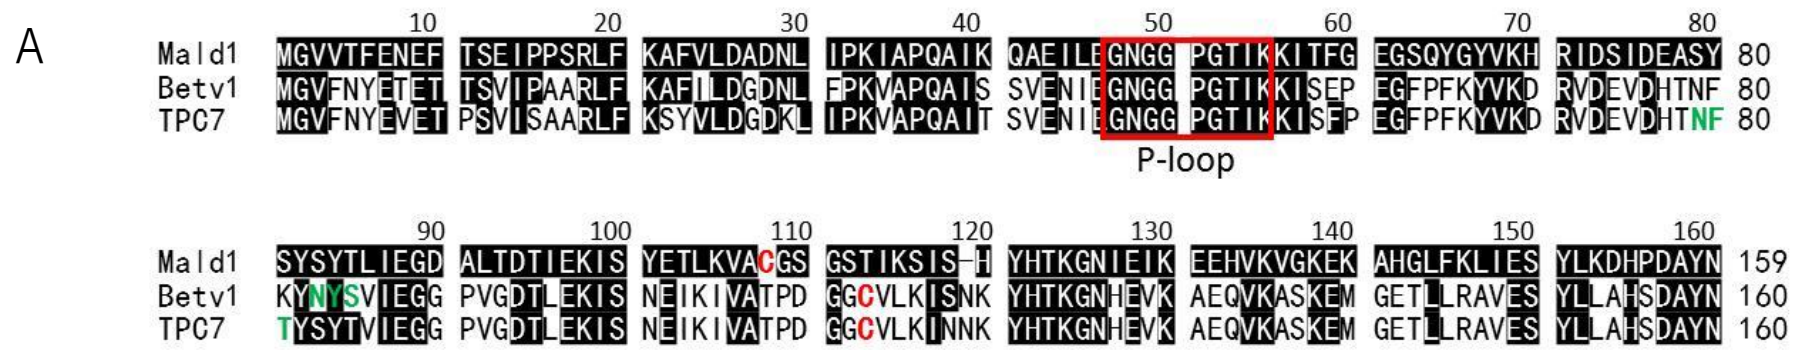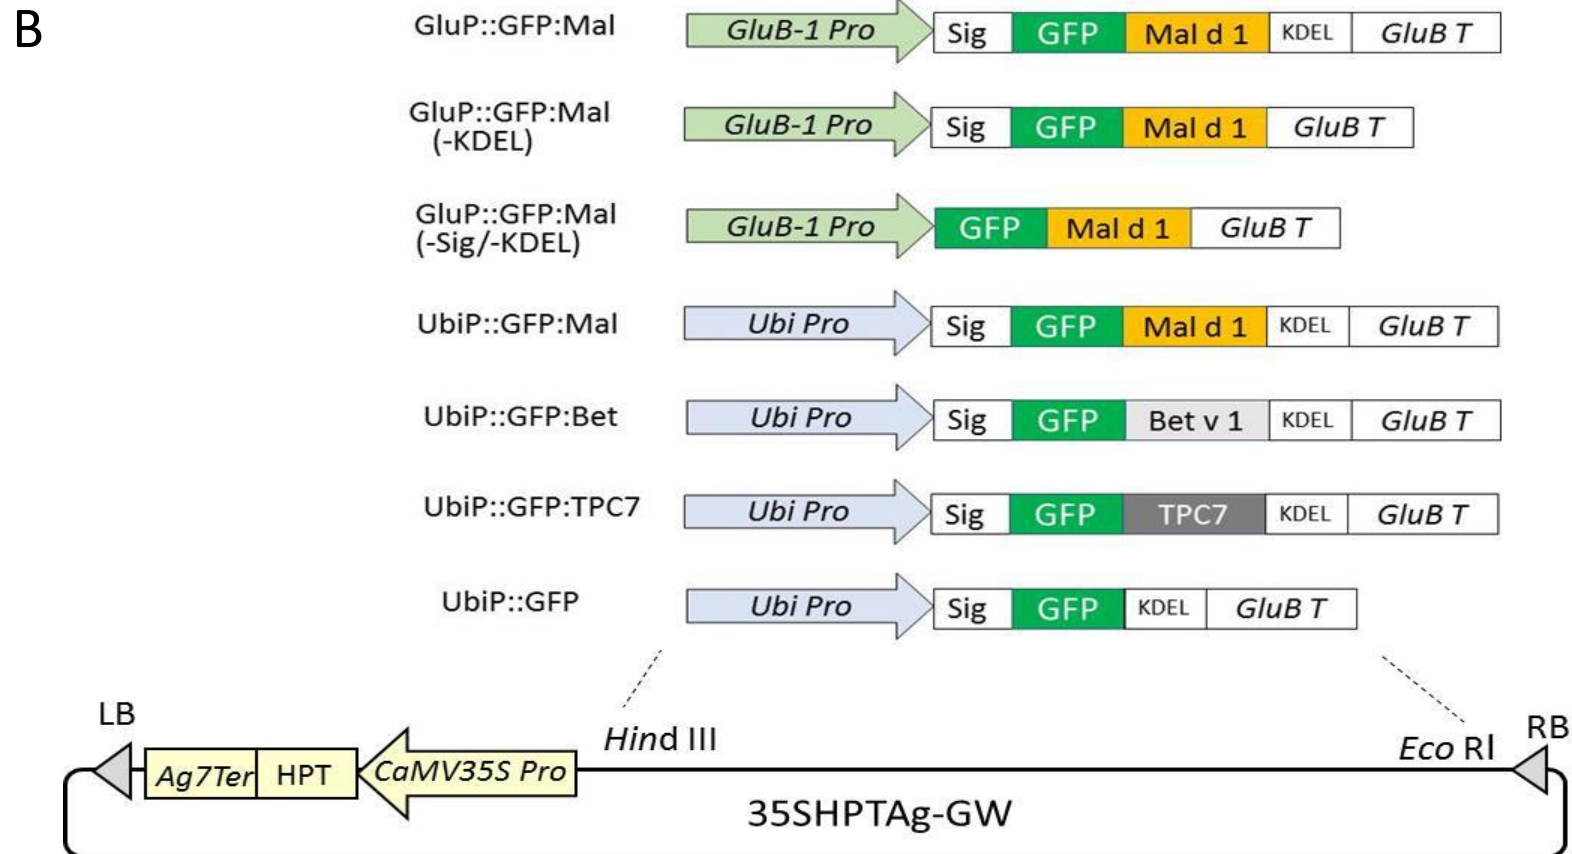

Fig. 1



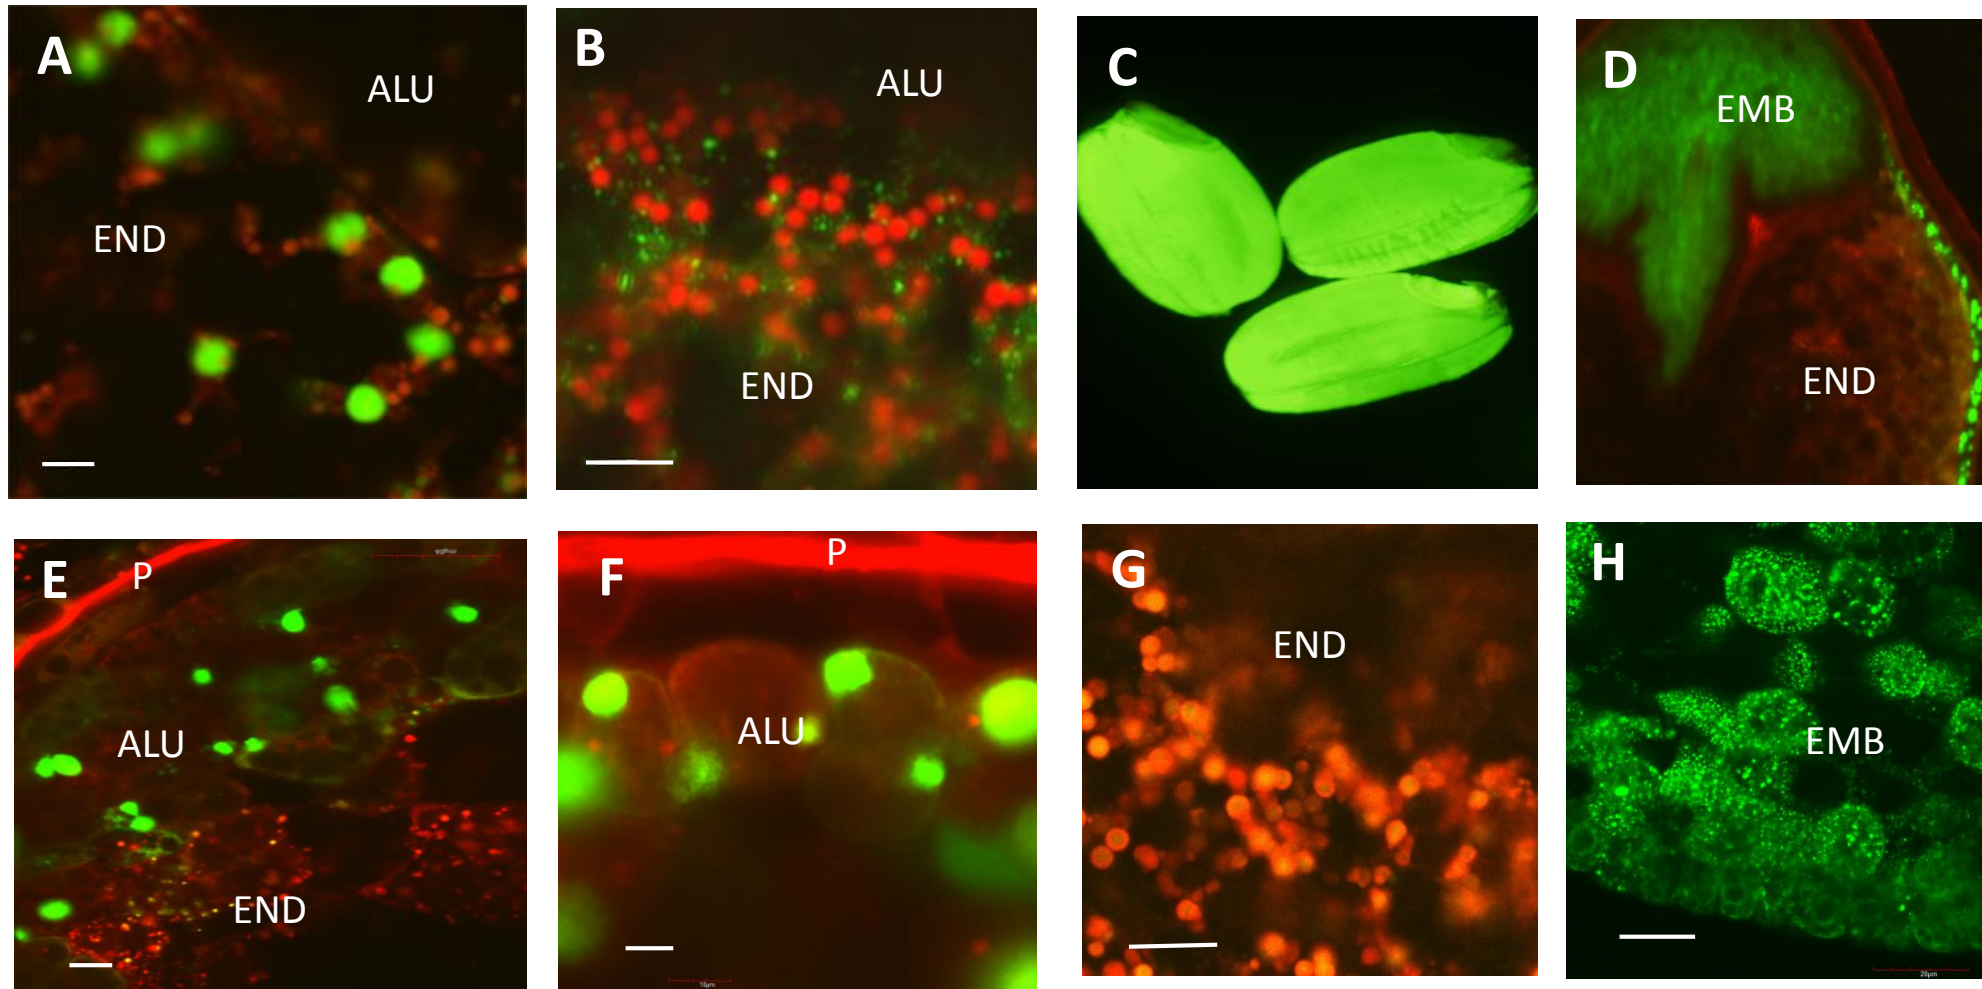

Fig. 2

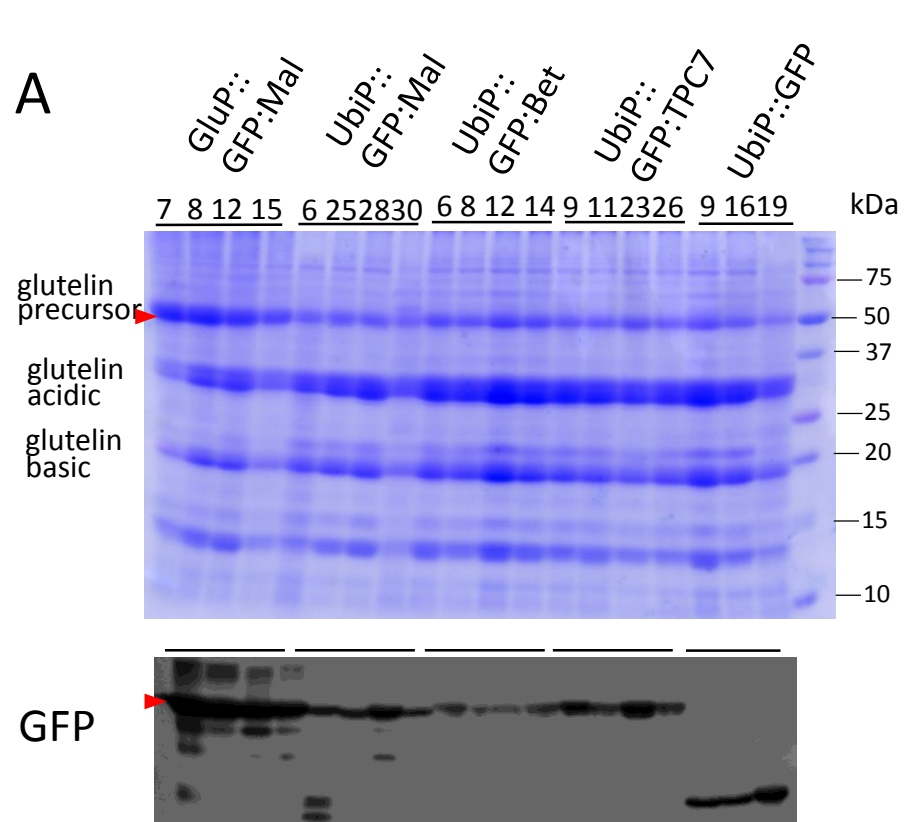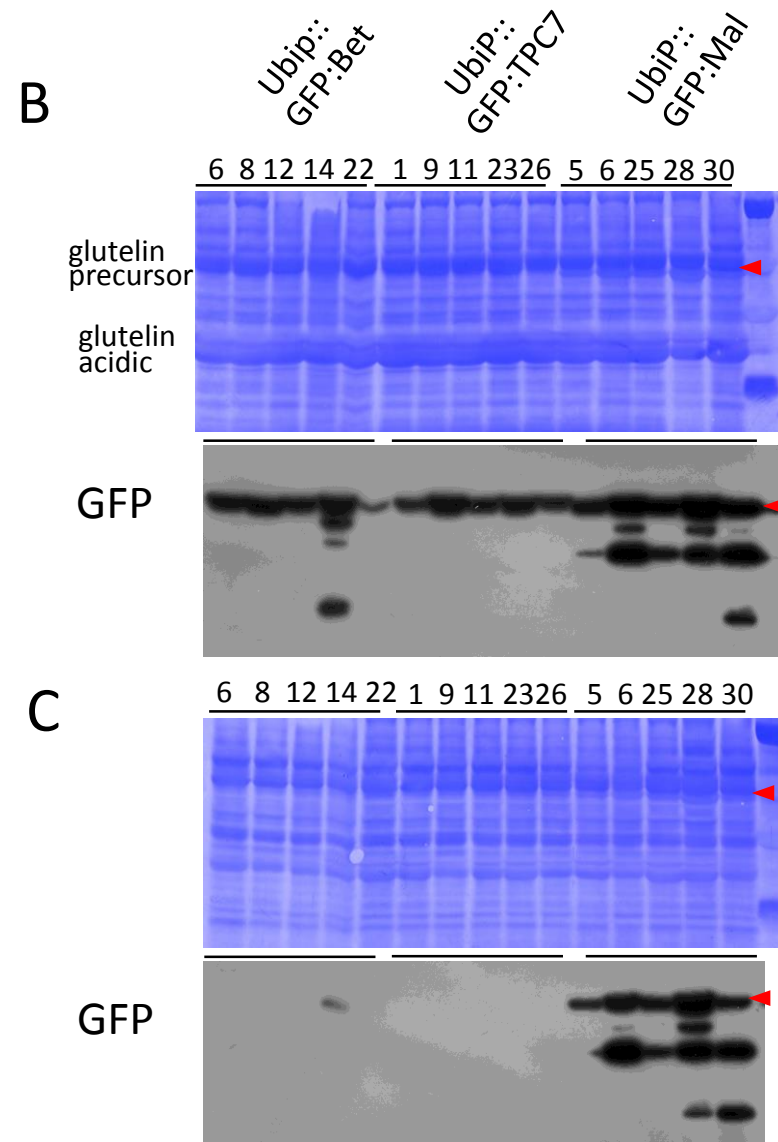

Fig. 3



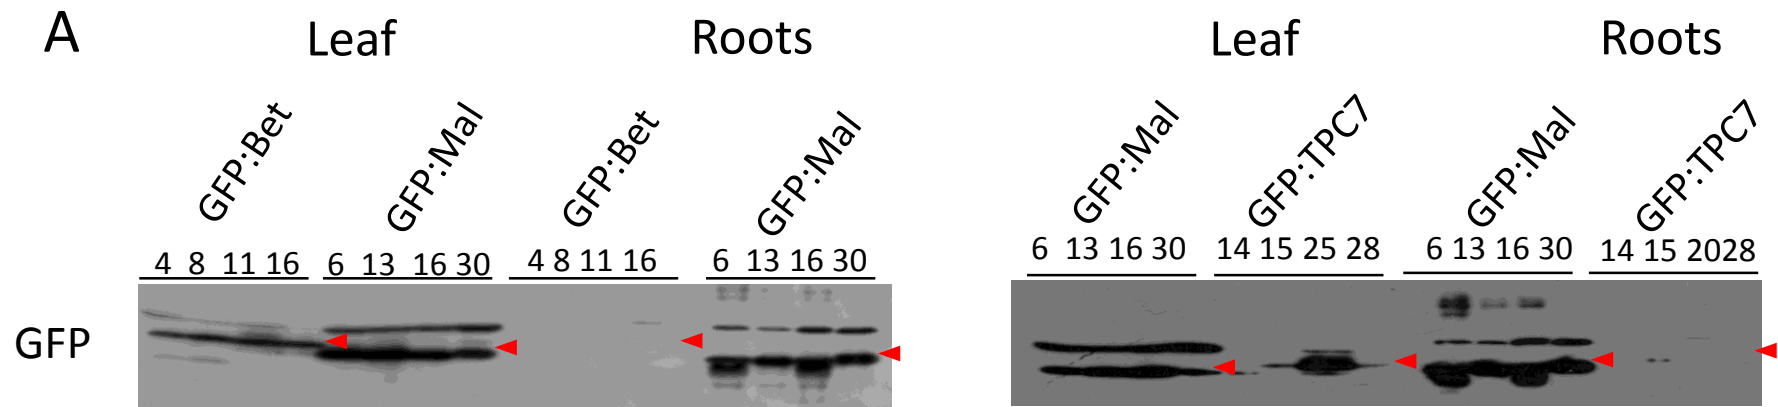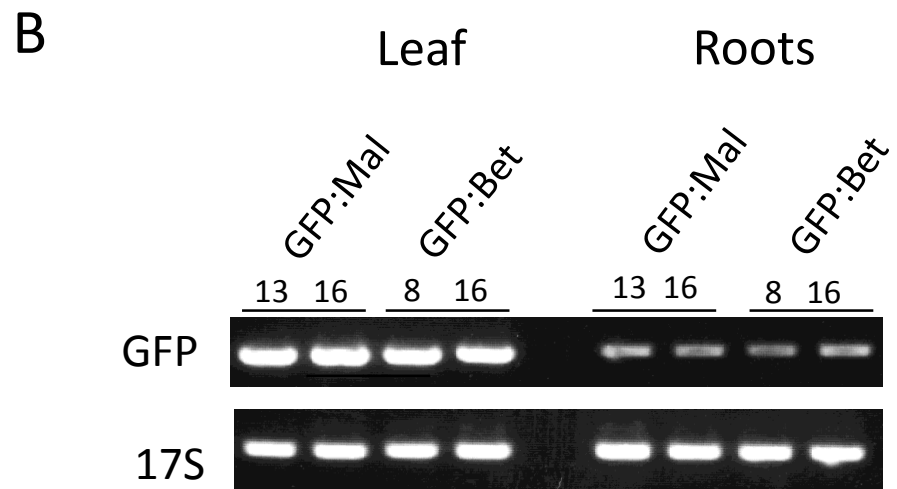

Fig. 4

A

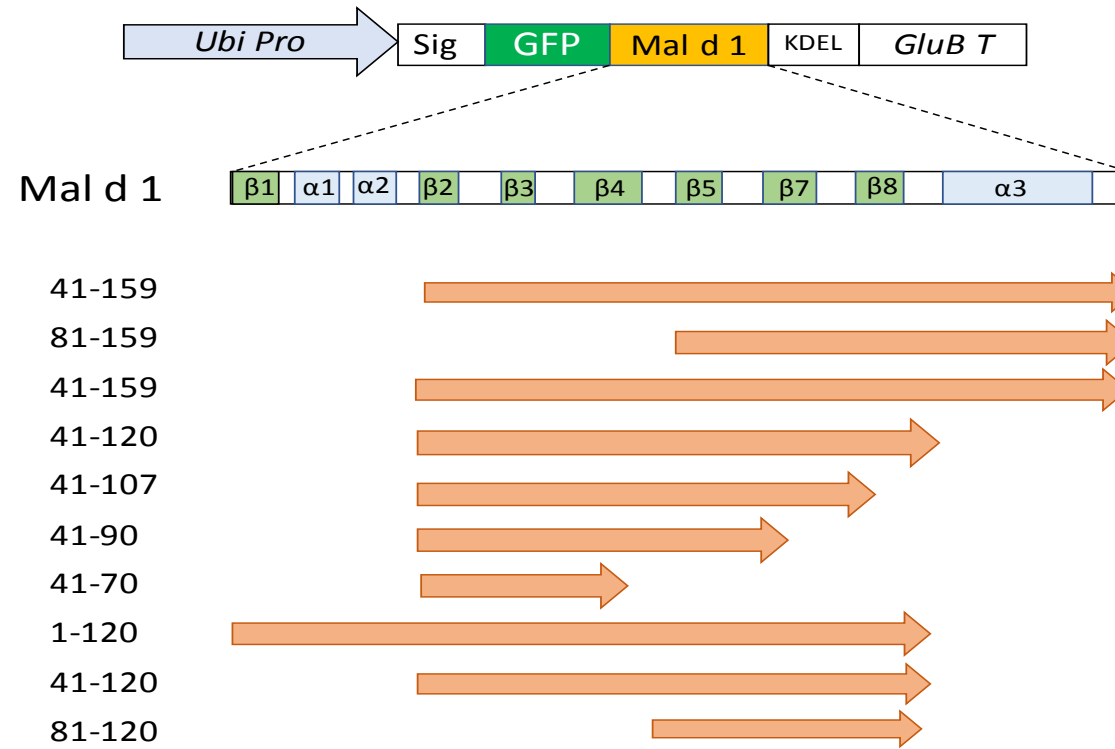

B

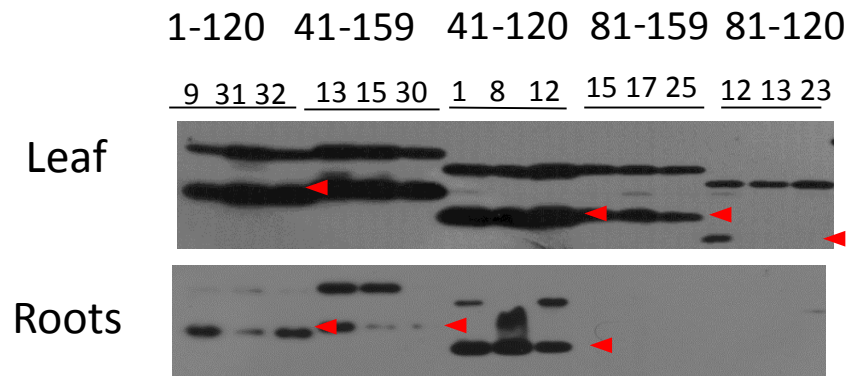

C

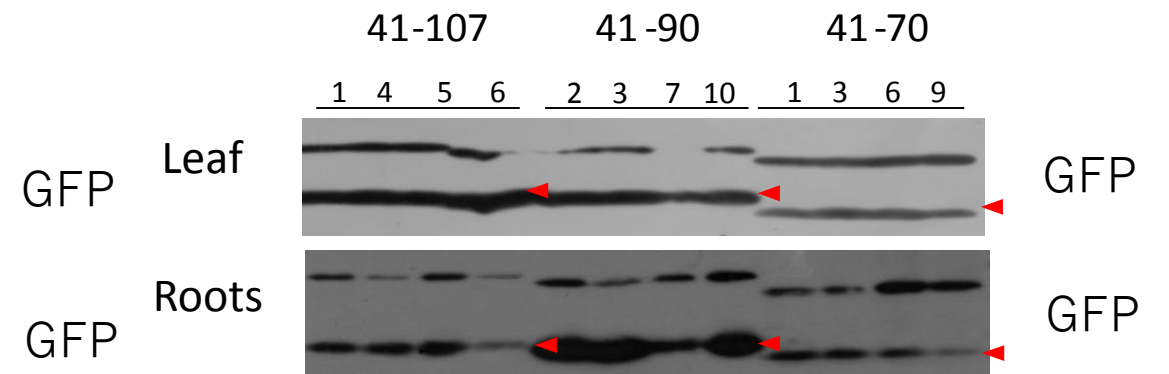

Fig. 5

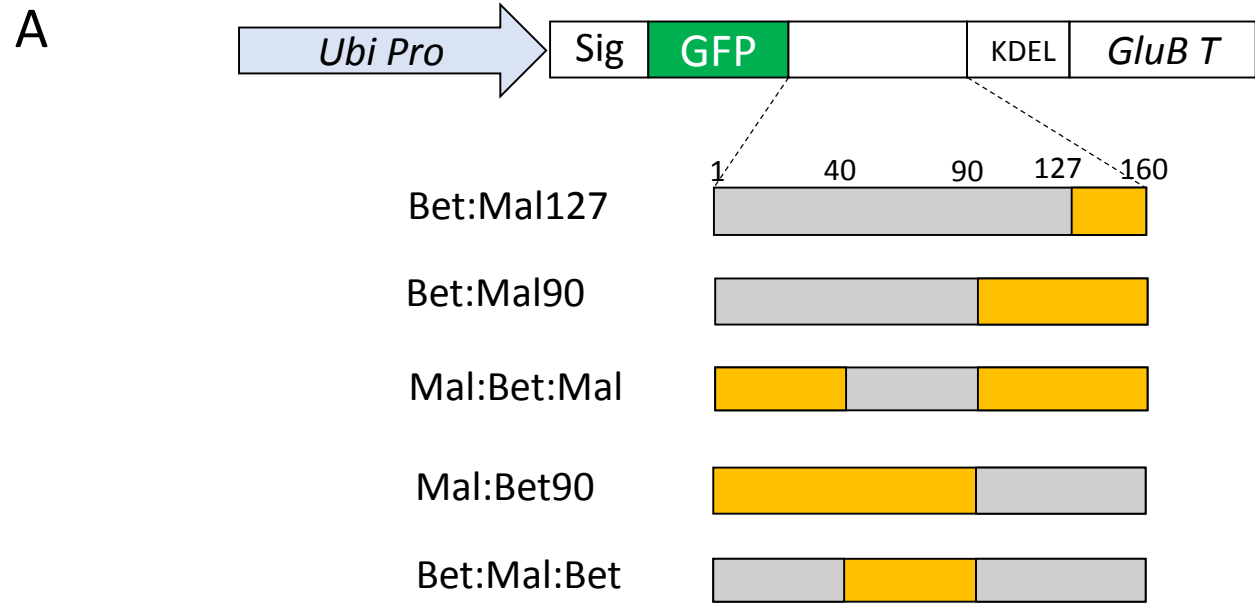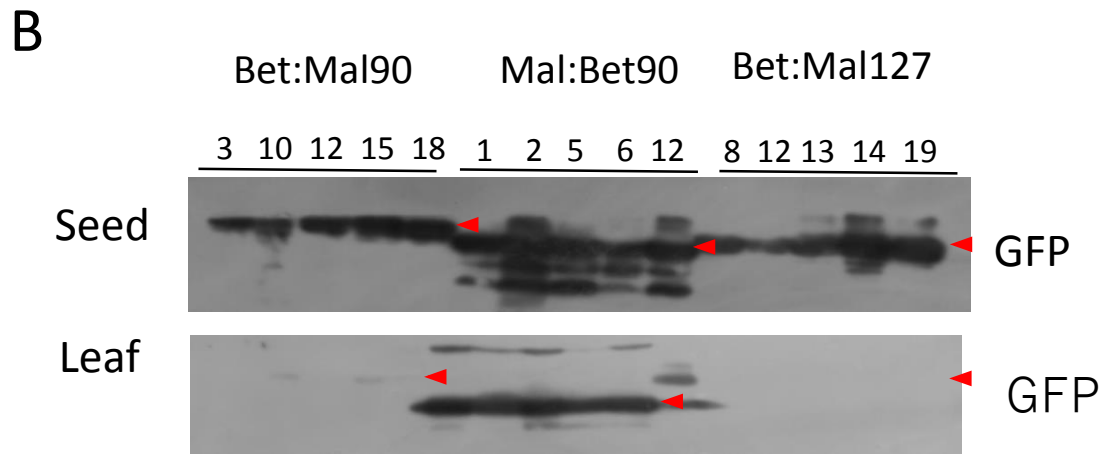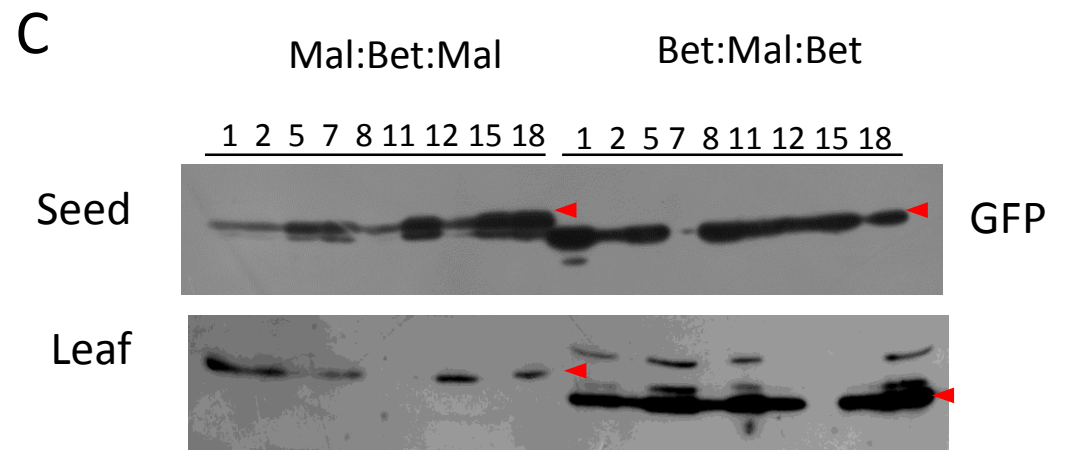

Fig. 6

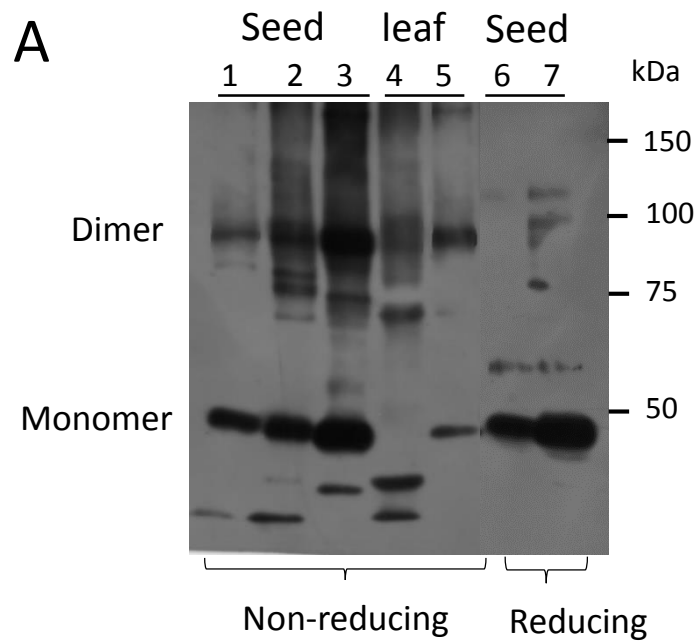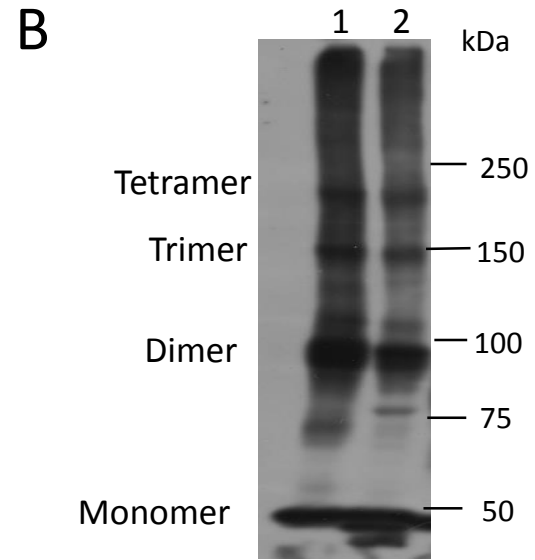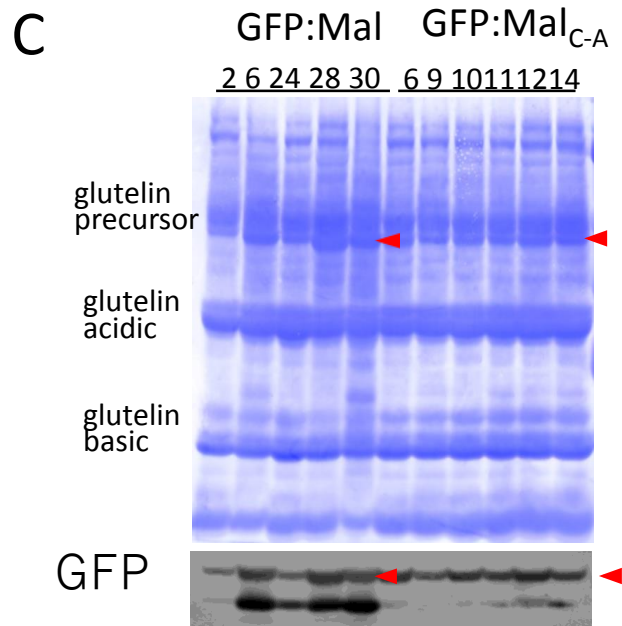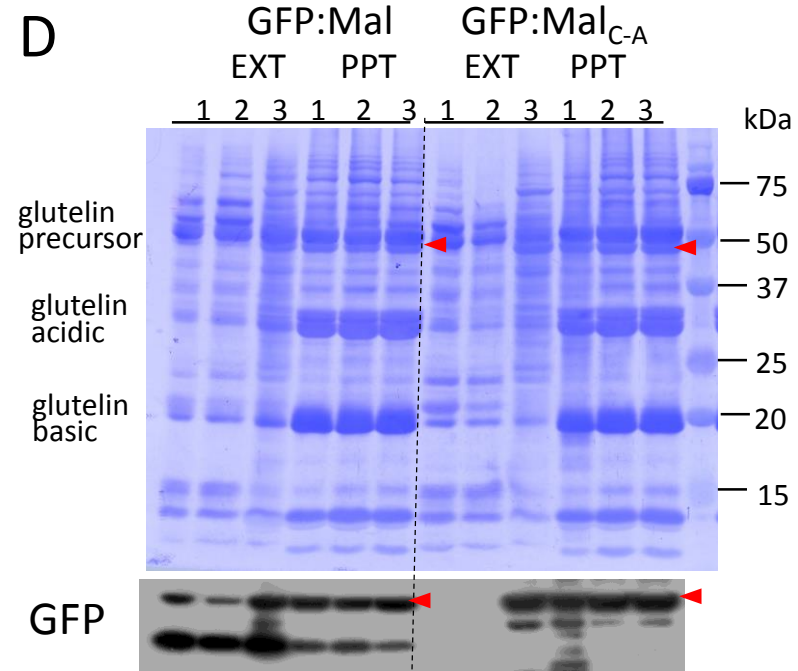

Fig. 7

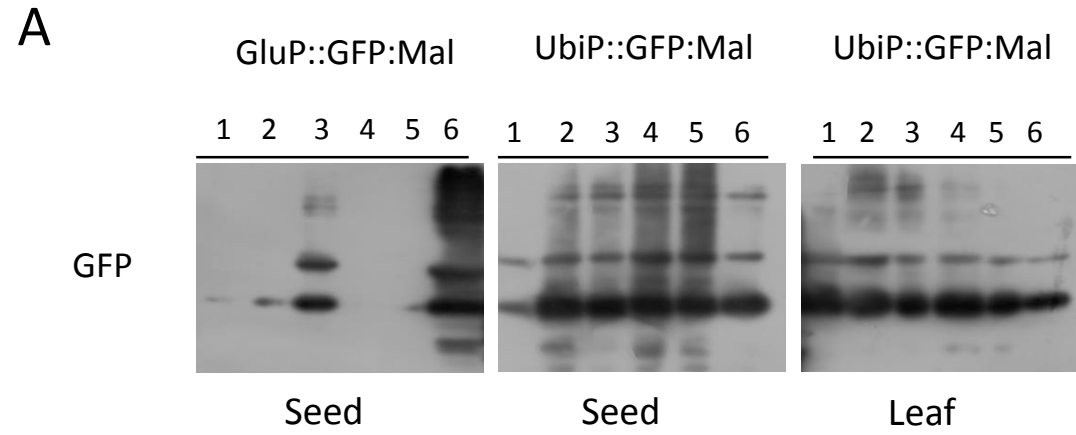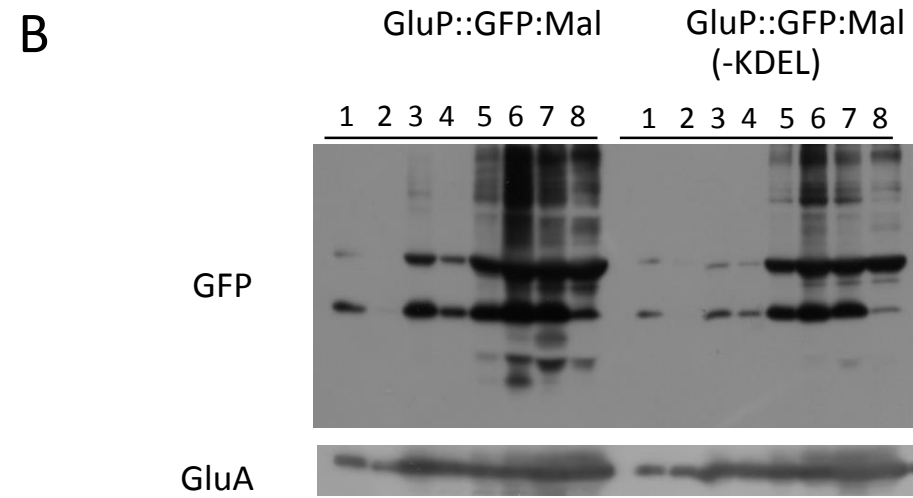

Fig. 8

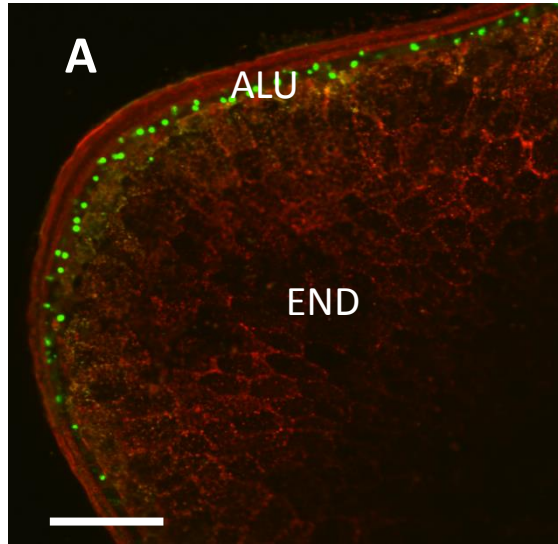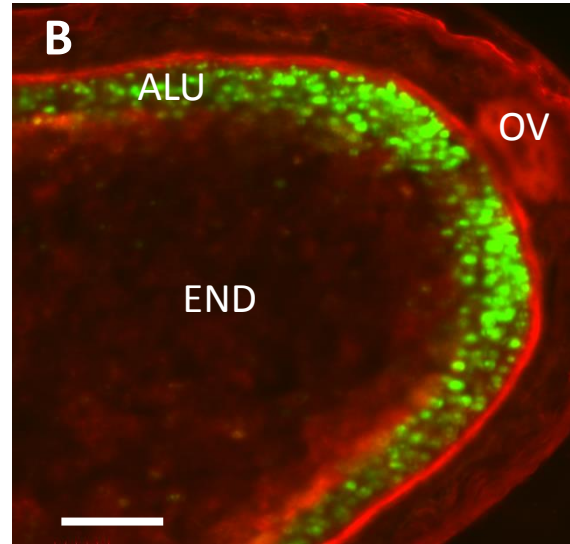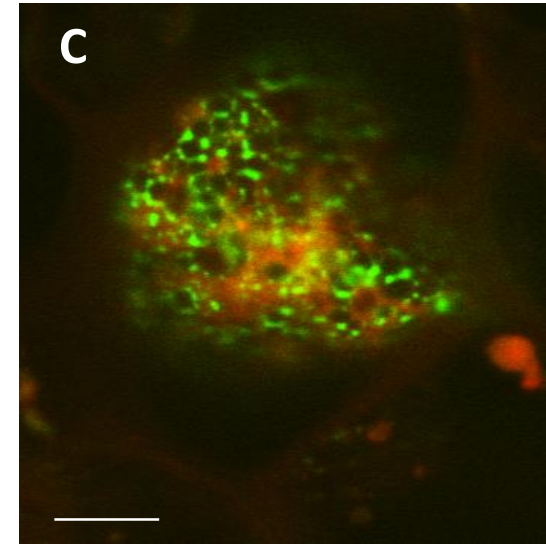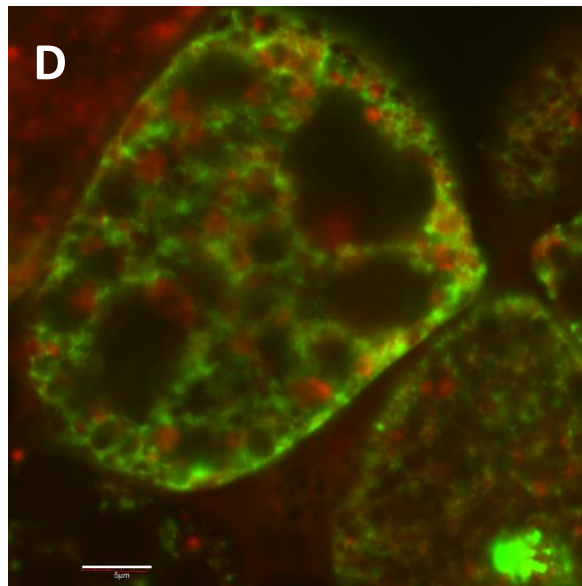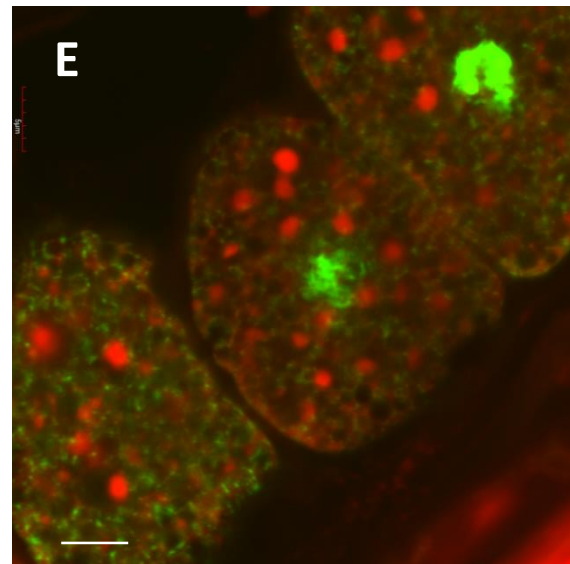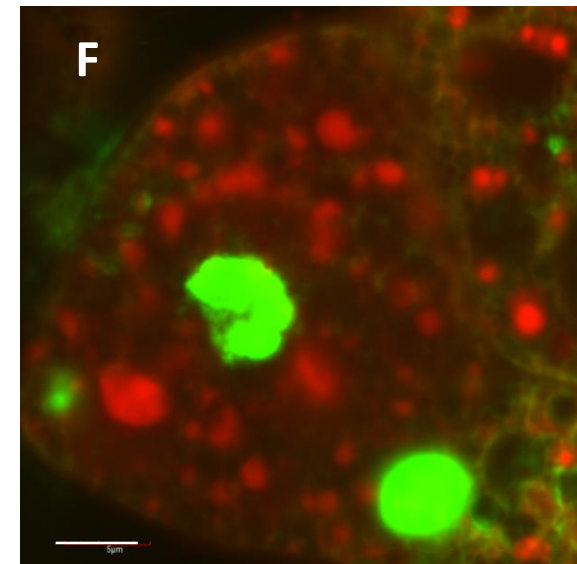

Fig. 9
